# Supplementary material for: The Peculiar Glycolytic Pathway in Hyperthermophylic Archaea: Understanding Its Whims by Experimentation In Silico
Source: Int J Mol Sci. 2017 Apr 20;18(4):876. doi: 10.3390/ijms18040876 (PMC5412457; doi:10.3390/ijms18040876)
Supplement: Supplementary file 1 [file ijms-18-00876-s001.zip]

Archive with 22 entries (18 files):
- hy2/
- hy2/S. solfataricus hy2 K=1.058 ATP and ADP ratio ranging from 1 to 4.cps
- hy2/S. solfataricus hy2 K=1.058.cps
- hy2/S. solfataricus hy2 K=1.58 increased substrates concentration.cps
- hy2/S. solfataricus hy2 K=10.58 ATP and ADP ratio ranging from 1 to 4.cps
- hy2/S. solfataricus hy2 K=10.58 increased substrates concentration.cps
- hy2/S. solfataricus hy2 K=105.8 ATP and ADP ratio ranging from 1 to 4.cps
- hy2/S. solfataricus hy2 K=105.8 increased substrates concentration.cps
- hy2/S. solfataricus hy2 K=105800.cps
- hy3/
- hy3/S. cerevisiae hy3 from GAP to PEP.cps
- hy3/S. cerevisiae hy3 from PEP to GAP.cps
- hy3/S. solfataricus hy3 from GAP to PEP.cps
- hy3/S. solfataricus hy3 from PEP to GAP.cps
- Thermodynamics.pdf
- copasi/
- copasi/COPASI-4.16.104-Windows.exe
- hy1/
- hy1/S. cerevisiae hy1.cps
- hy1/S. solfataricus hy1 increased GAPDH Vmax.cps
- hy1/S. solfataricus hy1 with GAPN added.cps
- hy1/S. solfataricus hy1.cps
