# Supplementary material for: The Peculiar Glycolytic Pathway in Hyperthermophylic Archaea: Understanding Its Whims by Experimentation In Silico
Source: Int J Mol Sci. 2017 Apr 20;18(4):876. doi: 10.3390/ijms18040876 (PMC5412457; doi:10.3390/ijms18040876)
Supplement: Supplementary file 1 [file ijms-18-00876-s001.zip › hy2/S. solfataricus hy2 K=10.58 ATP and ADP ratio ranging from 1 to 4.cps]

<?xml version="1.0" encoding="UTF-8"?>
<!-- generated with COPASI 4.16 (Build 104) (http://www.copasi.org) at 2017-02-28 09:40:20 UTC -->
<?oxygen RNGSchema="http://www.copasi.org/static/schema/CopasiML.rng" type="xml"?>
<COPASI xmlns="http://www.copasi.org/static/schema" versionMajor="4" versionMinor="16" versionDevel="104" copasiSourcesModified="0">
  <ListOfFunctions>
    <Function key="Function_13" name="Mass action (irreversible)" type="MassAction" reversible="false">
      <MiriamAnnotation>
<rdf:RDF xmlns:CopasiMT="http://www.copasi.org/RDF/MiriamTerms#" xmlns:dcterms="http://purl.org/dc/terms/" xmlns:rdf="http://www.w3.org/1999/02/22-rdf-syntax-ns#">
  <rdf:Description rdf:about="#Function_13">
    <dcterms:created>
      <rdf:Description>
        <dcterms:W3CDTF>2016-12-21T16:13:38Z</dcterms:W3CDTF>
      </rdf:Description>
    </dcterms:created>
    <CopasiMT:is rdf:resource="urn:miriam:obo.sbo:SBO:0000041" />
  </rdf:Description>
</rdf:RDF>
      </MiriamAnnotation>
      <Comment>
        <body xmlns="http://www.w3.org/1999/xhtml">
<b>Mass action rate law for first order irreversible reactions</b>
<p>
Reaction scheme where the products are created from the reactants and the change of a product quantity is proportional to the product of reactant activities. The reaction scheme does not include any reverse process that creates the reactants from the products. The change of a product quantity is proportional to the quantity of one reactant.
</p>
</body>
      </Comment>
      <Expression>
        k1*PRODUCT&lt;substrate_i&gt;
      </Expression>
      <ListOfParameterDescriptions>
        <ParameterDescription key="FunctionParameter_81" name="k1" order="0" role="constant"/>
        <ParameterDescription key="FunctionParameter_79" name="substrate" order="1" role="substrate"/>
      </ListOfParameterDescriptions>
    </Function>
    <Function key="Function_40" name="ENO " type="UserDefined" reversible="unspecified">
      <MiriamAnnotation>
<rdf:RDF xmlns:dcterms="http://purl.org/dc/terms/" xmlns:rdf="http://www.w3.org/1999/02/22-rdf-syntax-ns#">
  <rdf:Description rdf:about="#Function_40">
    <dcterms:created>
      <rdf:Description>
        <dcterms:W3CDTF>2016-04-20T11:14:15Z</dcterms:W3CDTF>
      </rdf:Description>
    </dcterms:created>
  </rdf:Description>
</rdf:RDF>
      </MiriamAnnotation>
      <Expression>
        VmENO/KmENOP2G*( P2G-PEP/KeqENO)/(1+P2G/KmENOP2G+PEP/KmENOPEP)
      </Expression>
      <ListOfParameterDescriptions>
        <ParameterDescription key="FunctionParameter_264" name="VmENO" order="0" role="constant"/>
        <ParameterDescription key="FunctionParameter_254" name="KmENOP2G" order="1" role="constant"/>
        <ParameterDescription key="FunctionParameter_258" name="P2G" order="2" role="substrate"/>
        <ParameterDescription key="FunctionParameter_266" name="PEP" order="3" role="product"/>
        <ParameterDescription key="FunctionParameter_268" name="KeqENO" order="4" role="constant"/>
        <ParameterDescription key="FunctionParameter_270" name="KmENOPEP" order="5" role="constant"/>
      </ListOfParameterDescriptions>
    </Function>
    <Function key="Function_41" name="PGMA" type="UserDefined" reversible="true">
      <MiriamAnnotation>
<rdf:RDF xmlns:dcterms="http://purl.org/dc/terms/" xmlns:rdf="http://www.w3.org/1999/02/22-rdf-syntax-ns#">
  <rdf:Description rdf:about="#Function_41">
    <dcterms:created>
      <rdf:Description>
        <dcterms:W3CDTF>2016-04-20T11:12:58Z</dcterms:W3CDTF>
      </rdf:Description>
    </dcterms:created>
  </rdf:Description>
</rdf:RDF>
      </MiriamAnnotation>
      <Expression>
        VmPGMA/KmPGMAP3G*(P3G-P2G/KeqPGMA)/(1+P3G/KmPGMAP3G+P2G/KmPGMAP2G)
      </Expression>
      <ListOfParameterDescriptions>
        <ParameterDescription key="FunctionParameter_271" name="VmPGMA" order="0" role="constant"/>
        <ParameterDescription key="FunctionParameter_267" name="KmPGMAP3G" order="1" role="constant"/>
        <ParameterDescription key="FunctionParameter_246" name="P3G" order="2" role="substrate"/>
        <ParameterDescription key="FunctionParameter_272" name="P2G" order="3" role="product"/>
        <ParameterDescription key="FunctionParameter_274" name="KeqPGMA" order="4" role="constant"/>
        <ParameterDescription key="FunctionParameter_276" name="KmPGMAP2G" order="5" role="constant"/>
      </ListOfParameterDescriptions>
    </Function>
    <Function key="Function_42" name="PYK" type="UserDefined" reversible="unspecified">
      <MiriamAnnotation>
<rdf:RDF xmlns:dcterms="http://purl.org/dc/terms/" xmlns:rdf="http://www.w3.org/1999/02/22-rdf-syntax-ns#">
  <rdf:Description rdf:about="#Function_42">
    <dcterms:created>
      <rdf:Description>
        <dcterms:W3CDTF>2016-04-22T11:04:45Z</dcterms:W3CDTF>
      </rdf:Description>
    </dcterms:created>
  </rdf:Description>
</rdf:RDF>
      </MiriamAnnotation>
      <Expression>
        VmPYK*(ADP*PEP/(KmPYKADP*KmPYKPEP)-ATP*PYR/(KmPYKADP*KeqPYK*KmPYKPEP))/((1+ADP/KmPYKADP+ATP/KmPYKATP)*(1+PEP/KmPYKPEP+PYR/KmPYKPYR))
      </Expression>
      <ListOfParameterDescriptions>
        <ParameterDescription key="FunctionParameter_277" name="VmPYK" order="0" role="constant"/>
        <ParameterDescription key="FunctionParameter_273" name="ADP" order="1" role="substrate"/>
        <ParameterDescription key="FunctionParameter_265" name="PEP" order="2" role="substrate"/>
        <ParameterDescription key="FunctionParameter_278" name="KmPYKADP" order="3" role="constant"/>
        <ParameterDescription key="FunctionParameter_280" name="KmPYKPEP" order="4" role="constant"/>
        <ParameterDescription key="FunctionParameter_282" name="ATP" order="5" role="product"/>
        <ParameterDescription key="FunctionParameter_284" name="PYR" order="6" role="product"/>
        <ParameterDescription key="FunctionParameter_286" name="KeqPYK" order="7" role="constant"/>
        <ParameterDescription key="FunctionParameter_288" name="KmPYKATP" order="8" role="constant"/>
        <ParameterDescription key="FunctionParameter_290" name="KmPYKPYR" order="9" role="constant"/>
      </ListOfParameterDescriptions>
    </Function>
    <Function key="Function_43" name="GAPN" type="UserDefined" reversible="unspecified">
      <MiriamAnnotation>
<rdf:RDF xmlns:dcterms="http://purl.org/dc/terms/" xmlns:rdf="http://www.w3.org/1999/02/22-rdf-syntax-ns#">
  <rdf:Description rdf:about="#Function_43">
    <dcterms:created>
      <rdf:Description>
        <dcterms:W3CDTF>2016-11-28T10:49:47Z</dcterms:W3CDTF>
      </rdf:Description>
    </dcterms:created>
  </rdf:Description>
</rdf:RDF>
      </MiriamAnnotation>
      <Expression>
        VmGAPN*GAP*NADP/(KmGAPNGAP*KmGAPNNADP)/((1+GAP/KmGAPNGAP)*(1+NADP/KmGAPNNADP))
      </Expression>
      <ListOfParameterDescriptions>
        <ParameterDescription key="FunctionParameter_291" name="VmGAPN" order="0" role="constant"/>
        <ParameterDescription key="FunctionParameter_287" name="GAP" order="1" role="substrate"/>
        <ParameterDescription key="FunctionParameter_283" name="NADP" order="2" role="substrate"/>
        <ParameterDescription key="FunctionParameter_279" name="KmGAPNGAP" order="3" role="constant"/>
        <ParameterDescription key="FunctionParameter_262" name="KmGAPNNADP" order="4" role="constant"/>
      </ListOfParameterDescriptions>
    </Function>
    <Function key="Function_44" name="GAPDH for S.solfataricus" type="UserDefined" reversible="unspecified">
      <MiriamAnnotation>
<rdf:RDF xmlns:dcterms="http://purl.org/dc/terms/" xmlns:rdf="http://www.w3.org/1999/02/22-rdf-syntax-ns#">
  <rdf:Description rdf:about="#Function_44">
    <dcterms:created>
      <rdf:Description>
        <dcterms:W3CDTF>2016-11-28T10:52:50Z</dcterms:W3CDTF>
      </rdf:Description>
    </dcterms:created>
  </rdf:Description>
</rdf:RDF>
      </MiriamAnnotation>
      <Expression>
        VmGAPDH*(GAP*NADP*Phosphate/(KmGAPDHGAP*KmGAPDHNADP*KmPhosphate)-BPG*NADPH/(KeqGAPDH*KmGAPDHGAP*KmGAPDHNADP*KmPhosphate))/((1+NADP/KmGAPDHNADP+NADPH/KmGAPDHNADPH)*((1+GAP/KmGAPDHGAP)*(1+Phosphate/KmPhosphate)+BPG/KmGAPDHBPG))
      </Expression>
      <ListOfParameterDescriptions>
        <ParameterDescription key="FunctionParameter_275" name="VmGAPDH" order="0" role="constant"/>
        <ParameterDescription key="FunctionParameter_281" name="GAP" order="1" role="substrate"/>
        <ParameterDescription key="FunctionParameter_289" name="NADP" order="2" role="substrate"/>
        <ParameterDescription key="FunctionParameter_293" name="Phosphate" order="3" role="substrate"/>
        <ParameterDescription key="FunctionParameter_295" name="KmGAPDHGAP" order="4" role="constant"/>
        <ParameterDescription key="FunctionParameter_297" name="KmGAPDHNADP" order="5" role="constant"/>
        <ParameterDescription key="FunctionParameter_299" name="KmPhosphate" order="6" role="constant"/>
        <ParameterDescription key="FunctionParameter_301" name="BPG" order="7" role="product"/>
        <ParameterDescription key="FunctionParameter_303" name="NADPH" order="8" role="product"/>
        <ParameterDescription key="FunctionParameter_305" name="KeqGAPDH" order="9" role="constant"/>
        <ParameterDescription key="FunctionParameter_307" name="KmGAPDHNADPH" order="10" role="constant"/>
        <ParameterDescription key="FunctionParameter_309" name="KmGAPDHBPG" order="11" role="constant"/>
      </ListOfParameterDescriptions>
    </Function>
    <Function key="Function_45" name="PGK for S.solfataricus" type="UserDefined" reversible="unspecified">
      <MiriamAnnotation>
<rdf:RDF xmlns:dcterms="http://purl.org/dc/terms/" xmlns:rdf="http://www.w3.org/1999/02/22-rdf-syntax-ns#">
  <rdf:Description rdf:about="#Function_45">
    <dcterms:created>
      <rdf:Description>
        <dcterms:W3CDTF>2016-11-28T10:55:36Z</dcterms:W3CDTF>
      </rdf:Description>
    </dcterms:created>
  </rdf:Description>
</rdf:RDF>
      </MiriamAnnotation>
      <Expression>
        VmPGK*(-ATP*P3G/(KmPGKATP*KmPGKP3G)+KeqPGK*ADP*BPG/(KmPGKATP*KmPGKP3G))/((1+ADP/KiADP)*(1+P3G/KmPGKP3G*(1+ATP/KmPGKATP)+BPG/KmPGKBPG*(1+ADP/KmPGKADP)))
      </Expression>
      <ListOfParameterDescriptions>
        <ParameterDescription key="FunctionParameter_310" name="VmPGK" order="0" role="constant"/>
        <ParameterDescription key="FunctionParameter_285" name="KeqPGK" order="1" role="constant"/>
        <ParameterDescription key="FunctionParameter_311" name="ADP" order="2" role="substrate"/>
        <ParameterDescription key="FunctionParameter_313" name="BPG" order="3" role="substrate"/>
        <ParameterDescription key="FunctionParameter_298" name="KmPGKATP" order="4" role="constant"/>
        <ParameterDescription key="FunctionParameter_306" name="ATP" order="5" role="product"/>
        <ParameterDescription key="FunctionParameter_302" name="P3G" order="6" role="product"/>
        <ParameterDescription key="FunctionParameter_315" name="KiADP" order="7" role="constant"/>
        <ParameterDescription key="FunctionParameter_294" name="KmPGKP3G" order="8" role="constant"/>
        <ParameterDescription key="FunctionParameter_317" name="KmPGKBPG" order="9" role="constant"/>
        <ParameterDescription key="FunctionParameter_319" name="KmPGKADP" order="10" role="constant"/>
      </ListOfParameterDescriptions>
    </Function>
    <Function key="Function_46" name="Spontenous degradation of BPG " type="UserDefined" reversible="unspecified">
      <MiriamAnnotation>
<rdf:RDF xmlns:dcterms="http://purl.org/dc/terms/" xmlns:rdf="http://www.w3.org/1999/02/22-rdf-syntax-ns#">
  <rdf:Description rdf:about="#Function_46">
    <dcterms:created>
      <rdf:Description>
        <dcterms:W3CDTF>2016-11-28T11:23:21Z</dcterms:W3CDTF>
      </rdf:Description>
    </dcterms:created>
  </rdf:Description>
</rdf:RDF>
      </MiriamAnnotation>
      <Expression>
        KdBPG*BPG
      </Expression>
      <ListOfParameterDescriptions>
        <ParameterDescription key="FunctionParameter_320" name="KdBPG" order="0" role="constant"/>
        <ParameterDescription key="FunctionParameter_316" name="BPG" order="1" role="substrate"/>
      </ListOfParameterDescriptions>
    </Function>
  </ListOfFunctions>
  <Model key="Model_3" name="Yanfei" simulationType="time" timeUnit="min" volumeUnit="l" areaUnit="m²" lengthUnit="m" quantityUnit="mmol" type="deterministic" avogadroConstant="6.02214179e+023">
    <MiriamAnnotation>
<rdf:RDF
   xmlns:dcterms="http://purl.org/dc/terms/"
   xmlns:rdf="http://www.w3.org/1999/02/22-rdf-syntax-ns#">
  <rdf:Description rdf:about="#Model_3">
    <dcterms:created>
      <rdf:Description>
        <dcterms:W3CDTF>2016-04-19T12:26:34Z</dcterms:W3CDTF>
      </rdf:Description>
    </dcterms:created>
  </rdf:Description>
</rdf:RDF>

    </MiriamAnnotation>
    <ListOfCompartments>
      <Compartment key="Compartment_1" name="default_compartment" simulationType="fixed" dimensionality="3">
        <MiriamAnnotation>
<rdf:RDF xmlns:dcterms="http://purl.org/dc/terms/" xmlns:rdf="http://www.w3.org/1999/02/22-rdf-syntax-ns#">
  <rdf:Description rdf:about="#Compartment_1">
    <dcterms:created>
      <rdf:Description>
        <dcterms:W3CDTF>2016-04-22T11:17:31Z</dcterms:W3CDTF>
      </rdf:Description>
    </dcterms:created>
  </rdf:Description>
</rdf:RDF>
        </MiriamAnnotation>
      </Compartment>
    </ListOfCompartments>
    <ListOfMetabolites>
      <Metabolite key="Metabolite_1" name="ADP" simulationType="reactions" compartment="Compartment_1">
        <MiriamAnnotation>
<rdf:RDF xmlns:CopasiMT="http://www.copasi.org/RDF/MiriamTerms#" xmlns:dcterms="http://purl.org/dc/terms/" xmlns:rdf="http://www.w3.org/1999/02/22-rdf-syntax-ns#">
  <rdf:Description rdf:about="#Metabolite_1">
    <dcterms:created>
      <rdf:Description>
        <dcterms:W3CDTF>2016-04-20T11:17:27Z</dcterms:W3CDTF>
      </rdf:Description>
    </dcterms:created>
    <CopasiMT:is>
      <rdf:Bag>
        <rdf:li rdf:resource="http://identifiers.org/kegg.compound/C00008" />
        <rdf:li rdf:resource="http://identifiers.org/obo.chebi/CHEBI%3A16761" />
      </rdf:Bag>
    </CopasiMT:is>
  </rdf:Description>
</rdf:RDF>
        </MiriamAnnotation>
      </Metabolite>
      <Metabolite key="Metabolite_3" name="ATP" simulationType="reactions" compartment="Compartment_1">
        <MiriamAnnotation>
<rdf:RDF xmlns:CopasiMT="http://www.copasi.org/RDF/MiriamTerms#" xmlns:dcterms="http://purl.org/dc/terms/" xmlns:rdf="http://www.w3.org/1999/02/22-rdf-syntax-ns#">
  <rdf:Description rdf:about="#Metabolite_3">
    <dcterms:created>
      <rdf:Description>
        <dcterms:W3CDTF>2016-04-26T12:30:57Z</dcterms:W3CDTF>
      </rdf:Description>
    </dcterms:created>
    <CopasiMT:is>
      <rdf:Bag>
        <rdf:li rdf:resource="http://identifiers.org/kegg.compound/C00002" />
        <rdf:li rdf:resource="http://identifiers.org/obo.chebi:CHEBI/15422" />
      </rdf:Bag>
    </CopasiMT:is>
  </rdf:Description>
</rdf:RDF>
        </MiriamAnnotation>
      </Metabolite>
      <Metabolite key="Metabolite_5" name="BPG" simulationType="reactions" compartment="Compartment_1">
        <MiriamAnnotation>
<rdf:RDF xmlns:CopasiMT="http://www.copasi.org/RDF/MiriamTerms#" xmlns:dcterms="http://purl.org/dc/terms/" xmlns:rdf="http://www.w3.org/1999/02/22-rdf-syntax-ns#">
  <rdf:Description rdf:about="#Metabolite_5">
    <dcterms:created>
      <rdf:Description>
        <dcterms:W3CDTF>2016-11-28T10:27:30Z</dcterms:W3CDTF>
      </rdf:Description>
    </dcterms:created>
    <CopasiMT:is>
      <rdf:Bag>
        <rdf:li rdf:resource="http://identifiers.org/kegg.compound/C00236" />
        <rdf:li rdf:resource="http://identifiers.org/obo.chebi/CHEBI%3A28907" />
      </rdf:Bag>
    </CopasiMT:is>
  </rdf:Description>
</rdf:RDF>
        </MiriamAnnotation>
      </Metabolite>
      <Metabolite key="Metabolite_7" name="GAP" simulationType="fixed" compartment="Compartment_1">
        <MiriamAnnotation>
<rdf:RDF xmlns:CopasiMT="http://www.copasi.org/RDF/MiriamTerms#" xmlns:dcterms="http://purl.org/dc/terms/" xmlns:rdf="http://www.w3.org/1999/02/22-rdf-syntax-ns#">
  <rdf:Description rdf:about="#Metabolite_7">
    <dcterms:created>
      <rdf:Description>
        <dcterms:W3CDTF>2016-04-20T11:24:39Z</dcterms:W3CDTF>
      </rdf:Description>
    </dcterms:created>
    <CopasiMT:is>
      <rdf:Bag>
        <rdf:li rdf:resource="http://identifiers.org/kegg.compound/C00661" />
        <rdf:li rdf:resource="http://identifiers.org/obo.chebi:CHEBI/17138" />
      </rdf:Bag>
    </CopasiMT:is>
  </rdf:Description>
</rdf:RDF>
        </MiriamAnnotation>
      </Metabolite>
      <Metabolite key="Metabolite_9" name="3PG" simulationType="reactions" compartment="Compartment_1">
        <MiriamAnnotation>
<rdf:RDF xmlns:CopasiMT="http://www.copasi.org/RDF/MiriamTerms#" xmlns:dcterms="http://purl.org/dc/terms/" xmlns:rdf="http://www.w3.org/1999/02/22-rdf-syntax-ns#">
  <rdf:Description rdf:about="#Metabolite_9">
    <dcterms:created>
      <rdf:Description>
        <dcterms:W3CDTF>2016-04-20T11:27:22Z</dcterms:W3CDTF>
      </rdf:Description>
    </dcterms:created>
    <CopasiMT:is>
      <rdf:Bag>
        <rdf:li rdf:resource="http://identifiers.org/kegg.compound/C00197" />
        <rdf:li rdf:resource="http://identifiers.org/obo.chebi/CHEBI%3A17794" />
      </rdf:Bag>
    </CopasiMT:is>
  </rdf:Description>
</rdf:RDF>
        </MiriamAnnotation>
      </Metabolite>
      <Metabolite key="Metabolite_11" name="PEP" simulationType="reactions" compartment="Compartment_1">
        <MiriamAnnotation>
<rdf:RDF xmlns:CopasiMT="http://www.copasi.org/RDF/MiriamTerms#" xmlns:dcterms="http://purl.org/dc/terms/" xmlns:rdf="http://www.w3.org/1999/02/22-rdf-syntax-ns#">
  <rdf:Description rdf:about="#Metabolite_11">
    <dcterms:created>
      <rdf:Description>
        <dcterms:W3CDTF>2016-04-20T11:27:22Z</dcterms:W3CDTF>
      </rdf:Description>
    </dcterms:created>
    <CopasiMT:is>
      <rdf:Bag>
        <rdf:li rdf:resource="http://identifiers.org/kegg.compound/C00074" />
        <rdf:li rdf:resource="http://identifiers.org/obo.chebi/CHEBI%3A44897" />
      </rdf:Bag>
    </CopasiMT:is>
  </rdf:Description>
</rdf:RDF>
        </MiriamAnnotation>
      </Metabolite>
      <Metabolite key="Metabolite_13" name="PYR" simulationType="fixed" compartment="Compartment_1">
        <MiriamAnnotation>
<rdf:RDF xmlns:CopasiMT="http://www.copasi.org/RDF/MiriamTerms#" xmlns:dcterms="http://purl.org/dc/terms/" xmlns:rdf="http://www.w3.org/1999/02/22-rdf-syntax-ns#">
  <rdf:Description rdf:about="#Metabolite_13">
    <dcterms:created>
      <rdf:Description>
        <dcterms:W3CDTF>2016-04-20T11:20:28Z</dcterms:W3CDTF>
      </rdf:Description>
    </dcterms:created>
    <CopasiMT:is>
      <rdf:Bag>
        <rdf:li rdf:resource="http://identifiers.org/kegg.compound/C00022" />
        <rdf:li rdf:resource="http://identifiers.org/obo.chebi/CHEBI%3A32816" />
      </rdf:Bag>
    </CopasiMT:is>
  </rdf:Description>
</rdf:RDF>
        </MiriamAnnotation>
      </Metabolite>
      <Metabolite key="Metabolite_15" name="2PG" simulationType="reactions" compartment="Compartment_1">
        <MiriamAnnotation>
<rdf:RDF xmlns:dcterms="http://purl.org/dc/terms/" xmlns:rdf="http://www.w3.org/1999/02/22-rdf-syntax-ns#">
  <rdf:Description rdf:about="#Metabolite_15">
    <dcterms:created>
      <rdf:Description>
        <dcterms:W3CDTF>2016-04-20T11:27:16Z</dcterms:W3CDTF>
      </rdf:Description>
    </dcterms:created>
  </rdf:Description>
</rdf:RDF>
        </MiriamAnnotation>
      </Metabolite>
      <Metabolite key="Metabolite_17" name="Phosphate" simulationType="fixed" compartment="Compartment_1">
        <MiriamAnnotation>
<rdf:RDF xmlns:dcterms="http://purl.org/dc/terms/" xmlns:rdf="http://www.w3.org/1999/02/22-rdf-syntax-ns#">
  <rdf:Description rdf:about="#Metabolite_17">
    <dcterms:created>
      <rdf:Description>
        <dcterms:W3CDTF>2016-11-28T10:40:01Z</dcterms:W3CDTF>
      </rdf:Description>
    </dcterms:created>
  </rdf:Description>
</rdf:RDF>
        </MiriamAnnotation>
      </Metabolite>
      <Metabolite key="Metabolite_19" name="NADP" simulationType="fixed" compartment="Compartment_1">
        <MiriamAnnotation>
<rdf:RDF xmlns:dcterms="http://purl.org/dc/terms/" xmlns:rdf="http://www.w3.org/1999/02/22-rdf-syntax-ns#">
  <rdf:Description rdf:about="#Metabolite_19">
    <dcterms:created>
      <rdf:Description>
        <dcterms:W3CDTF>2016-11-28T11:10:19Z</dcterms:W3CDTF>
      </rdf:Description>
    </dcterms:created>
  </rdf:Description>
</rdf:RDF>
        </MiriamAnnotation>
      </Metabolite>
      <Metabolite key="Metabolite_21" name="NADPH" simulationType="fixed" compartment="Compartment_1">
        <MiriamAnnotation>
<rdf:RDF xmlns:dcterms="http://purl.org/dc/terms/" xmlns:rdf="http://www.w3.org/1999/02/22-rdf-syntax-ns#">
  <rdf:Description rdf:about="#Metabolite_21">
    <dcterms:created>
      <rdf:Description>
        <dcterms:W3CDTF>2016-11-28T11:10:26Z</dcterms:W3CDTF>
      </rdf:Description>
    </dcterms:created>
  </rdf:Description>
</rdf:RDF>
        </MiriamAnnotation>
      </Metabolite>
    </ListOfMetabolites>
    <ListOfModelValues>
      <ModelValue key="ModelValue_0" name="KmGAPDHBPG" simulationType="fixed">
        <MiriamAnnotation>
<rdf:RDF xmlns:dcterms="http://purl.org/dc/terms/" xmlns:rdf="http://www.w3.org/1999/02/22-rdf-syntax-ns#">
  <rdf:Description rdf:about="#ModelValue_0">
    <dcterms:created>
      <rdf:Description>
        <dcterms:W3CDTF>2016-06-14T21:40:19Z</dcterms:W3CDTF>
      </rdf:Description>
    </dcterms:created>
  </rdf:Description>
</rdf:RDF>
        </MiriamAnnotation>
      </ModelValue>
      <ModelValue key="ModelValue_1" name="KmGAPDHGAP" simulationType="fixed">
        <MiriamAnnotation>
<rdf:RDF xmlns:dcterms="http://purl.org/dc/terms/" xmlns:rdf="http://www.w3.org/1999/02/22-rdf-syntax-ns#">
  <rdf:Description rdf:about="#ModelValue_1">
    <dcterms:created>
      <rdf:Description>
        <dcterms:W3CDTF>2016-06-14T21:41:39Z</dcterms:W3CDTF>
      </rdf:Description>
    </dcterms:created>
  </rdf:Description>
</rdf:RDF>
        </MiriamAnnotation>
      </ModelValue>
      <ModelValue key="ModelValue_2" name="KiADP" simulationType="fixed">
        <MiriamAnnotation>
<rdf:RDF xmlns:dcterms="http://purl.org/dc/terms/" xmlns:rdf="http://www.w3.org/1999/02/22-rdf-syntax-ns#">
  <rdf:Description rdf:about="#ModelValue_2">
    <dcterms:created>
      <rdf:Description>
        <dcterms:W3CDTF>2016-06-15T11:00:28Z</dcterms:W3CDTF>
      </rdf:Description>
    </dcterms:created>
  </rdf:Description>
</rdf:RDF>
        </MiriamAnnotation>
      </ModelValue>
      <ModelValue key="ModelValue_3" name="KmGAPDHNADP" simulationType="fixed">
        <MiriamAnnotation>
<rdf:RDF xmlns:dcterms="http://purl.org/dc/terms/" xmlns:rdf="http://www.w3.org/1999/02/22-rdf-syntax-ns#">
  <rdf:Description rdf:about="#ModelValue_3">
    <dcterms:created>
      <rdf:Description>
        <dcterms:W3CDTF>2016-06-14T21:41:43Z</dcterms:W3CDTF>
      </rdf:Description>
    </dcterms:created>
  </rdf:Description>
</rdf:RDF>
        </MiriamAnnotation>
      </ModelValue>
      <ModelValue key="ModelValue_4" name="KmGAPDHNADPH" simulationType="fixed">
        <MiriamAnnotation>
<rdf:RDF xmlns:dcterms="http://purl.org/dc/terms/" xmlns:rdf="http://www.w3.org/1999/02/22-rdf-syntax-ns#">
  <rdf:Description rdf:about="#ModelValue_4">
    <dcterms:created>
      <rdf:Description>
        <dcterms:W3CDTF>2016-06-14T21:41:40Z</dcterms:W3CDTF>
      </rdf:Description>
    </dcterms:created>
  </rdf:Description>
</rdf:RDF>
        </MiriamAnnotation>
      </ModelValue>
      <ModelValue key="ModelValue_5" name="KmPGKADP" simulationType="fixed">
        <MiriamAnnotation>
<rdf:RDF xmlns:dcterms="http://purl.org/dc/terms/" xmlns:rdf="http://www.w3.org/1999/02/22-rdf-syntax-ns#">
  <rdf:Description rdf:about="#ModelValue_5">
    <dcterms:created>
      <rdf:Description>
        <dcterms:W3CDTF>2016-06-14T22:41:46Z</dcterms:W3CDTF>
      </rdf:Description>
    </dcterms:created>
  </rdf:Description>
</rdf:RDF>
        </MiriamAnnotation>
      </ModelValue>
      <ModelValue key="ModelValue_6" name="KmPGKATP" simulationType="fixed">
        <MiriamAnnotation>
<rdf:RDF xmlns:dcterms="http://purl.org/dc/terms/" xmlns:rdf="http://www.w3.org/1999/02/22-rdf-syntax-ns#">
  <rdf:Description rdf:about="#ModelValue_6">
    <dcterms:created>
      <rdf:Description>
        <dcterms:W3CDTF>2016-06-14T21:41:42Z</dcterms:W3CDTF>
      </rdf:Description>
    </dcterms:created>
  </rdf:Description>
</rdf:RDF>
        </MiriamAnnotation>
      </ModelValue>
      <ModelValue key="ModelValue_7" name="KmPGKP3G" simulationType="fixed">
        <MiriamAnnotation>
<rdf:RDF xmlns:dcterms="http://purl.org/dc/terms/" xmlns:rdf="http://www.w3.org/1999/02/22-rdf-syntax-ns#">
  <rdf:Description rdf:about="#ModelValue_7">
    <dcterms:created>
      <rdf:Description>
        <dcterms:W3CDTF>2016-06-14T22:41:29Z</dcterms:W3CDTF>
      </rdf:Description>
    </dcterms:created>
  </rdf:Description>
</rdf:RDF>
        </MiriamAnnotation>
      </ModelValue>
      <ModelValue key="ModelValue_8" name="KmPGKBPG" simulationType="fixed">
        <MiriamAnnotation>
<rdf:RDF xmlns:dcterms="http://purl.org/dc/terms/" xmlns:rdf="http://www.w3.org/1999/02/22-rdf-syntax-ns#">
  <rdf:Description rdf:about="#ModelValue_8">
    <dcterms:created>
      <rdf:Description>
        <dcterms:W3CDTF>2016-06-14T22:41:16Z</dcterms:W3CDTF>
      </rdf:Description>
    </dcterms:created>
  </rdf:Description>
</rdf:RDF>
        </MiriamAnnotation>
      </ModelValue>
      <ModelValue key="ModelValue_9" name="Kpi" simulationType="fixed">
        <MiriamAnnotation>
<rdf:RDF xmlns:dcterms="http://purl.org/dc/terms/" xmlns:rdf="http://www.w3.org/1999/02/22-rdf-syntax-ns#">
  <rdf:Description rdf:about="#ModelValue_9">
    <dcterms:created>
      <rdf:Description>
        <dcterms:W3CDTF>2016-04-20T15:22:45Z</dcterms:W3CDTF>
      </rdf:Description>
    </dcterms:created>
  </rdf:Description>
</rdf:RDF>
        </MiriamAnnotation>
      </ModelValue>
      <ModelValue key="ModelValue_10" name="VmPGKr" simulationType="fixed">
        <MiriamAnnotation>
<rdf:RDF xmlns:dcterms="http://purl.org/dc/terms/" xmlns:rdf="http://www.w3.org/1999/02/22-rdf-syntax-ns#">
  <rdf:Description rdf:about="#ModelValue_10">
    <dcterms:created>
      <rdf:Description>
        <dcterms:W3CDTF>2016-04-20T15:42:44Z</dcterms:W3CDTF>
      </rdf:Description>
    </dcterms:created>
  </rdf:Description>
</rdf:RDF>
        </MiriamAnnotation>
      </ModelValue>
      <ModelValue key="ModelValue_11" name="VmGAPDHf" simulationType="fixed">
        <MiriamAnnotation>
<rdf:RDF xmlns:dcterms="http://purl.org/dc/terms/" xmlns:rdf="http://www.w3.org/1999/02/22-rdf-syntax-ns#">
  <rdf:Description rdf:about="#ModelValue_11">
    <dcterms:created>
      <rdf:Description>
        <dcterms:W3CDTF>2016-06-14T21:39:49Z</dcterms:W3CDTF>
      </rdf:Description>
    </dcterms:created>
  </rdf:Description>
</rdf:RDF>
        </MiriamAnnotation>
      </ModelValue>
      <ModelValue key="ModelValue_12" name="kPK" simulationType="fixed">
        <MiriamAnnotation>
<rdf:RDF xmlns:dcterms="http://purl.org/dc/terms/" xmlns:rdf="http://www.w3.org/1999/02/22-rdf-syntax-ns#">
  <rdf:Description rdf:about="#ModelValue_12">
    <dcterms:created>
      <rdf:Description>
        <dcterms:W3CDTF>2016-04-28T16:31:55Z</dcterms:W3CDTF>
      </rdf:Description>
    </dcterms:created>
  </rdf:Description>
</rdf:RDF>
        </MiriamAnnotation>
      </ModelValue>
      <ModelValue key="ModelValue_13" name="kdBPG" simulationType="fixed">
        <MiriamAnnotation>
<rdf:RDF xmlns:dcterms="http://purl.org/dc/terms/" xmlns:rdf="http://www.w3.org/1999/02/22-rdf-syntax-ns#">
  <rdf:Description rdf:about="#ModelValue_13">
    <dcterms:created>
      <rdf:Description>
        <dcterms:W3CDTF>2016-06-14T21:41:38Z</dcterms:W3CDTF>
      </rdf:Description>
    </dcterms:created>
  </rdf:Description>
</rdf:RDF>
        </MiriamAnnotation>
      </ModelValue>
      <ModelValue key="ModelValue_14" name="n" simulationType="fixed">
        <MiriamAnnotation>
<rdf:RDF xmlns:dcterms="http://purl.org/dc/terms/" xmlns:rdf="http://www.w3.org/1999/02/22-rdf-syntax-ns#">
  <rdf:Description rdf:about="#ModelValue_14">
    <dcterms:created>
      <rdf:Description>
        <dcterms:W3CDTF>2016-06-14T21:40:40Z</dcterms:W3CDTF>
      </rdf:Description>
    </dcterms:created>
  </rdf:Description>
</rdf:RDF>
        </MiriamAnnotation>
      </ModelValue>
      <ModelValue key="ModelValue_15" name="KeqENO" simulationType="fixed">
        <MiriamAnnotation>
<rdf:RDF xmlns:dcterms="http://purl.org/dc/terms/" xmlns:rdf="http://www.w3.org/1999/02/22-rdf-syntax-ns#">
  <rdf:Description rdf:about="#ModelValue_15">
    <dcterms:created>
      <rdf:Description>
        <dcterms:W3CDTF>2016-06-14T21:48:48Z</dcterms:W3CDTF>
      </rdf:Description>
    </dcterms:created>
  </rdf:Description>
</rdf:RDF>
        </MiriamAnnotation>
      </ModelValue>
      <ModelValue key="ModelValue_16" name="KmENOK2PG" simulationType="fixed">
        <MiriamAnnotation>
<rdf:RDF xmlns:dcterms="http://purl.org/dc/terms/" xmlns:rdf="http://www.w3.org/1999/02/22-rdf-syntax-ns#">
  <rdf:Description rdf:about="#ModelValue_16">
    <dcterms:created>
      <rdf:Description>
        <dcterms:W3CDTF>2016-06-14T21:48:38Z</dcterms:W3CDTF>
      </rdf:Description>
    </dcterms:created>
  </rdf:Description>
</rdf:RDF>
        </MiriamAnnotation>
      </ModelValue>
      <ModelValue key="ModelValue_17" name="KmENOKPEP" simulationType="fixed">
        <MiriamAnnotation>
<rdf:RDF xmlns:dcterms="http://purl.org/dc/terms/" xmlns:rdf="http://www.w3.org/1999/02/22-rdf-syntax-ns#">
  <rdf:Description rdf:about="#ModelValue_17">
    <dcterms:created>
      <rdf:Description>
        <dcterms:W3CDTF>2016-06-14T21:49:29Z</dcterms:W3CDTF>
      </rdf:Description>
    </dcterms:created>
  </rdf:Description>
</rdf:RDF>
        </MiriamAnnotation>
      </ModelValue>
      <ModelValue key="ModelValue_18" name="VmENO" simulationType="fixed">
        <MiriamAnnotation>
<rdf:RDF xmlns:dcterms="http://purl.org/dc/terms/" xmlns:rdf="http://www.w3.org/1999/02/22-rdf-syntax-ns#">
  <rdf:Description rdf:about="#ModelValue_18">
    <dcterms:created>
      <rdf:Description>
        <dcterms:W3CDTF>2016-06-14T21:47:45Z</dcterms:W3CDTF>
      </rdf:Description>
    </dcterms:created>
  </rdf:Description>
</rdf:RDF>
        </MiriamAnnotation>
      </ModelValue>
      <ModelValue key="ModelValue_19" name="VmPYK" simulationType="fixed">
        <MiriamAnnotation>
<rdf:RDF xmlns:dcterms="http://purl.org/dc/terms/" xmlns:rdf="http://www.w3.org/1999/02/22-rdf-syntax-ns#">
  <rdf:Description rdf:about="#ModelValue_19">
    <dcterms:created>
      <rdf:Description>
        <dcterms:W3CDTF>2016-06-14T22:07:29Z</dcterms:W3CDTF>
      </rdf:Description>
    </dcterms:created>
  </rdf:Description>
</rdf:RDF>
        </MiriamAnnotation>
      </ModelValue>
      <ModelValue key="ModelValue_20" name="KmPYKADP" simulationType="fixed">
        <MiriamAnnotation>
<rdf:RDF xmlns:dcterms="http://purl.org/dc/terms/" xmlns:rdf="http://www.w3.org/1999/02/22-rdf-syntax-ns#">
  <rdf:Description rdf:about="#ModelValue_20">
    <dcterms:created>
      <rdf:Description>
        <dcterms:W3CDTF>2016-11-28T10:34:49Z</dcterms:W3CDTF>
      </rdf:Description>
    </dcterms:created>
  </rdf:Description>
</rdf:RDF>
        </MiriamAnnotation>
      </ModelValue>
      <ModelValue key="ModelValue_21" name="KmPYKATP" simulationType="fixed">
        <MiriamAnnotation>
<rdf:RDF xmlns:dcterms="http://purl.org/dc/terms/" xmlns:rdf="http://www.w3.org/1999/02/22-rdf-syntax-ns#">
  <rdf:Description rdf:about="#ModelValue_21">
    <dcterms:created>
      <rdf:Description>
        <dcterms:W3CDTF>2016-06-14T22:15:33Z</dcterms:W3CDTF>
      </rdf:Description>
    </dcterms:created>
  </rdf:Description>
</rdf:RDF>
        </MiriamAnnotation>
      </ModelValue>
      <ModelValue key="ModelValue_22" name="KmPYKPEP" simulationType="fixed">
        <MiriamAnnotation>
<rdf:RDF xmlns:dcterms="http://purl.org/dc/terms/" xmlns:rdf="http://www.w3.org/1999/02/22-rdf-syntax-ns#">
  <rdf:Description rdf:about="#ModelValue_22">
    <dcterms:created>
      <rdf:Description>
        <dcterms:W3CDTF>2016-11-28T10:35:12Z</dcterms:W3CDTF>
      </rdf:Description>
    </dcterms:created>
  </rdf:Description>
</rdf:RDF>
        </MiriamAnnotation>
      </ModelValue>
      <ModelValue key="ModelValue_23" name="VmGAPN" simulationType="fixed">
        <MiriamAnnotation>
<rdf:RDF xmlns:dcterms="http://purl.org/dc/terms/" xmlns:rdf="http://www.w3.org/1999/02/22-rdf-syntax-ns#">
  <rdf:Description rdf:about="#ModelValue_23">
    <dcterms:created>
      <rdf:Description>
        <dcterms:W3CDTF>2016-06-14T21:54:47Z</dcterms:W3CDTF>
      </rdf:Description>
    </dcterms:created>
  </rdf:Description>
</rdf:RDF>
        </MiriamAnnotation>
      </ModelValue>
      <ModelValue key="ModelValue_24" name="KmGAPNGAP" simulationType="fixed">
        <MiriamAnnotation>
<rdf:RDF xmlns:dcterms="http://purl.org/dc/terms/" xmlns:rdf="http://www.w3.org/1999/02/22-rdf-syntax-ns#">
  <rdf:Description rdf:about="#ModelValue_24">
    <dcterms:created>
      <rdf:Description>
        <dcterms:W3CDTF>2016-06-14T21:55:06Z</dcterms:W3CDTF>
      </rdf:Description>
    </dcterms:created>
  </rdf:Description>
</rdf:RDF>
        </MiriamAnnotation>
      </ModelValue>
      <ModelValue key="ModelValue_25" name="KmGAPNNADP" simulationType="fixed">
        <MiriamAnnotation>
<rdf:RDF xmlns:dcterms="http://purl.org/dc/terms/" xmlns:rdf="http://www.w3.org/1999/02/22-rdf-syntax-ns#">
  <rdf:Description rdf:about="#ModelValue_25">
    <dcterms:created>
      <rdf:Description>
        <dcterms:W3CDTF>2016-06-14T21:55:22Z</dcterms:W3CDTF>
      </rdf:Description>
    </dcterms:created>
  </rdf:Description>
</rdf:RDF>
        </MiriamAnnotation>
      </ModelValue>
      <ModelValue key="ModelValue_26" name="KmPGMA3PG" simulationType="fixed">
      </ModelValue>
      <ModelValue key="ModelValue_27" name="KmPGMA2PG" simulationType="fixed">
        <MiriamAnnotation>
<rdf:RDF xmlns:dcterms="http://purl.org/dc/terms/" xmlns:rdf="http://www.w3.org/1999/02/22-rdf-syntax-ns#">
  <rdf:Description rdf:about="#ModelValue_27">
    <dcterms:created>
      <rdf:Description>
        <dcterms:W3CDTF>2016-06-14T23:09:38Z</dcterms:W3CDTF>
      </rdf:Description>
    </dcterms:created>
  </rdf:Description>
</rdf:RDF>
        </MiriamAnnotation>
      </ModelValue>
      <ModelValue key="ModelValue_28" name="VmPGMA" simulationType="fixed">
        <MiriamAnnotation>
<rdf:RDF xmlns:dcterms="http://purl.org/dc/terms/" xmlns:rdf="http://www.w3.org/1999/02/22-rdf-syntax-ns#">
  <rdf:Description rdf:about="#ModelValue_28">
    <dcterms:created>
      <rdf:Description>
        <dcterms:W3CDTF>2016-06-14T23:22:18Z</dcterms:W3CDTF>
      </rdf:Description>
    </dcterms:created>
  </rdf:Description>
</rdf:RDF>
        </MiriamAnnotation>
      </ModelValue>
      <ModelValue key="ModelValue_29" name="KeqPGMA" simulationType="fixed">
        <MiriamAnnotation>
<rdf:RDF xmlns:dcterms="http://purl.org/dc/terms/" xmlns:rdf="http://www.w3.org/1999/02/22-rdf-syntax-ns#">
  <rdf:Description rdf:about="#ModelValue_29">
    <dcterms:created>
      <rdf:Description>
        <dcterms:W3CDTF>2016-11-28T11:19:54Z</dcterms:W3CDTF>
      </rdf:Description>
    </dcterms:created>
  </rdf:Description>
</rdf:RDF>
        </MiriamAnnotation>
      </ModelValue>
      <ModelValue key="ModelValue_30" name="KmPYKPYR" simulationType="fixed">
        <MiriamAnnotation>
<rdf:RDF xmlns:dcterms="http://purl.org/dc/terms/" xmlns:rdf="http://www.w3.org/1999/02/22-rdf-syntax-ns#">
  <rdf:Description rdf:about="#ModelValue_30">
    <dcterms:created>
      <rdf:Description>
        <dcterms:W3CDTF>2016-11-28T10:35:17Z</dcterms:W3CDTF>
      </rdf:Description>
    </dcterms:created>
  </rdf:Description>
</rdf:RDF>
        </MiriamAnnotation>
      </ModelValue>
      <ModelValue key="ModelValue_31" name="KeqPYK" simulationType="fixed">
        <MiriamAnnotation>
<rdf:RDF xmlns:dcterms="http://purl.org/dc/terms/" xmlns:rdf="http://www.w3.org/1999/02/22-rdf-syntax-ns#">
  <rdf:Description rdf:about="#ModelValue_31">
    <dcterms:created>
      <rdf:Description>
        <dcterms:W3CDTF>2016-06-14T22:13:07Z</dcterms:W3CDTF>
      </rdf:Description>
    </dcterms:created>
  </rdf:Description>
</rdf:RDF>
        </MiriamAnnotation>
      </ModelValue>
      <ModelValue key="ModelValue_32" name="KATPase" simulationType="fixed">
        <MiriamAnnotation>
<rdf:RDF xmlns:dcterms="http://purl.org/dc/terms/" xmlns:rdf="http://www.w3.org/1999/02/22-rdf-syntax-ns#">
  <rdf:Description rdf:about="#ModelValue_32">
    <dcterms:created>
      <rdf:Description>
        <dcterms:W3CDTF>2016-06-14T22:19:24Z</dcterms:W3CDTF>
      </rdf:Description>
    </dcterms:created>
  </rdf:Description>
</rdf:RDF>
        </MiriamAnnotation>
      </ModelValue>
      <ModelValue key="ModelValue_33" name="KeqGAPDH" simulationType="fixed">
        <MiriamAnnotation>
<rdf:RDF xmlns:dcterms="http://purl.org/dc/terms/" xmlns:rdf="http://www.w3.org/1999/02/22-rdf-syntax-ns#">
  <rdf:Description rdf:about="#ModelValue_33">
    <dcterms:created>
      <rdf:Description>
        <dcterms:W3CDTF>2016-06-15T11:01:07Z</dcterms:W3CDTF>
      </rdf:Description>
    </dcterms:created>
  </rdf:Description>
</rdf:RDF>
        </MiriamAnnotation>
      </ModelValue>
      <ModelValue key="ModelValue_34" name="KeqPGK" simulationType="fixed">
        <MiriamAnnotation>
<rdf:RDF xmlns:dcterms="http://purl.org/dc/terms/" xmlns:rdf="http://www.w3.org/1999/02/22-rdf-syntax-ns#">
  <rdf:Description rdf:about="#ModelValue_34">
    <dcterms:created>
      <rdf:Description>
        <dcterms:W3CDTF>2016-11-28T11:14:09Z</dcterms:W3CDTF>
      </rdf:Description>
    </dcterms:created>
  </rdf:Description>
</rdf:RDF>
        </MiriamAnnotation>
      </ModelValue>
      <ModelValue key="ModelValue_35" name="KmGAPDHPhosphate" simulationType="fixed">
        <MiriamAnnotation>
<rdf:RDF xmlns:dcterms="http://purl.org/dc/terms/" xmlns:rdf="http://www.w3.org/1999/02/22-rdf-syntax-ns#">
  <rdf:Description rdf:about="#ModelValue_35">
    <dcterms:created>
      <rdf:Description>
        <dcterms:W3CDTF>2016-06-28T12:35:48Z</dcterms:W3CDTF>
      </rdf:Description>
    </dcterms:created>
  </rdf:Description>
</rdf:RDF>
        </MiriamAnnotation>
      </ModelValue>
      <ModelValue key="ModelValue_36" name="ATP consumption flux/ Pyruvate flux " simulationType="assignment">
        <MiriamAnnotation>
<rdf:RDF xmlns:dcterms="http://purl.org/dc/terms/" xmlns:rdf="http://www.w3.org/1999/02/22-rdf-syntax-ns#">
  <rdf:Description rdf:about="#ModelValue_36">
    <dcterms:created>
      <rdf:Description>
        <dcterms:W3CDTF>2016-11-21T12:31:46Z</dcterms:W3CDTF>
      </rdf:Description>
    </dcterms:created>
  </rdf:Description>
</rdf:RDF>
        </MiriamAnnotation>
        <Expression>
          &lt;CN=Root,Model=Yanfei,Vector=Reactions[Atpase],Reference=Flux&gt;/&lt;CN=Root,Model=Yanfei,Vector=Reactions[PYK],Reference=Flux&gt;
        </Expression>
      </ModelValue>
      <ModelValue key="ModelValue_37" name="ATP/ADP ratio" simulationType="assignment">
        <MiriamAnnotation>
<rdf:RDF xmlns:dcterms="http://purl.org/dc/terms/" xmlns:rdf="http://www.w3.org/1999/02/22-rdf-syntax-ns#">
  <rdf:Description rdf:about="#ModelValue_37">
    <dcterms:created>
      <rdf:Description>
        <dcterms:W3CDTF>2016-12-22T12:35:02Z</dcterms:W3CDTF>
      </rdf:Description>
    </dcterms:created>
  </rdf:Description>
</rdf:RDF>
        </MiriamAnnotation>
        <Expression>
          &lt;CN=Root,Model=Yanfei,Vector=Compartments[default_compartment],Vector=Metabolites[ATP],Reference=Concentration&gt;/&lt;CN=Root,Model=Yanfei,Vector=Compartments[default_compartment],Vector=Metabolites[ADP],Reference=Concentration&gt;
        </Expression>
      </ModelValue>
    </ListOfModelValues>
    <ListOfReactions>
      <Reaction key="Reaction_0" name="PGK" reversible="true" fast="false">
        <MiriamAnnotation>
<rdf:RDF xmlns:CopasiMT="http://www.copasi.org/RDF/MiriamTerms#" xmlns:dcterms="http://purl.org/dc/terms/" xmlns:rdf="http://www.w3.org/1999/02/22-rdf-syntax-ns#">
  <rdf:Description rdf:about="#Reaction_0">
    <dcterms:created>
      <rdf:Description>
        <dcterms:W3CDTF>2016-04-20T11:02:00Z</dcterms:W3CDTF>
      </rdf:Description>
    </dcterms:created>
    <CopasiMT:is>
      <rdf:Bag>
        <rdf:li rdf:resource="http://identifiers.org/kegg.reaction/R01512" />
      </rdf:Bag>
    </CopasiMT:is>
  </rdf:Description>
</rdf:RDF>
        </MiriamAnnotation>
        <ListOfSubstrates>
          <Substrate metabolite="Metabolite_1" stoichiometry="1"/>
          <Substrate metabolite="Metabolite_5" stoichiometry="1"/>
        </ListOfSubstrates>
        <ListOfProducts>
          <Product metabolite="Metabolite_3" stoichiometry="1"/>
          <Product metabolite="Metabolite_9" stoichiometry="1"/>
        </ListOfProducts>
        <ListOfConstants>
          <Constant key="Parameter_4396" name="VmPGK" value="73"/>
          <Constant key="Parameter_4395" name="KeqPGK" value="3793"/>
          <Constant key="Parameter_4394" name="KmPGKATP" value="9.303"/>
          <Constant key="Parameter_4393" name="KiADP" value="1.14174"/>
          <Constant key="Parameter_4392" name="KmPGKP3G" value="0.567"/>
          <Constant key="Parameter_4391" name="KmPGKBPG" value="0.0082"/>
          <Constant key="Parameter_4390" name="KmPGKADP" value="0.374"/>
        </ListOfConstants>
        <KineticLaw function="Function_45">
          <ListOfCallParameters>
            <CallParameter functionParameter="FunctionParameter_310">
              <SourceParameter reference="ModelValue_10"/>
            </CallParameter>
            <CallParameter functionParameter="FunctionParameter_285">
              <SourceParameter reference="ModelValue_34"/>
            </CallParameter>
            <CallParameter functionParameter="FunctionParameter_311">
              <SourceParameter reference="Metabolite_1"/>
            </CallParameter>
            <CallParameter functionParameter="FunctionParameter_313">
              <SourceParameter reference="Metabolite_5"/>
            </CallParameter>
            <CallParameter functionParameter="FunctionParameter_298">
              <SourceParameter reference="ModelValue_6"/>
            </CallParameter>
            <CallParameter functionParameter="FunctionParameter_306">
              <SourceParameter reference="Metabolite_3"/>
            </CallParameter>
            <CallParameter functionParameter="FunctionParameter_302">
              <SourceParameter reference="Metabolite_9"/>
            </CallParameter>
            <CallParameter functionParameter="FunctionParameter_315">
              <SourceParameter reference="ModelValue_2"/>
            </CallParameter>
            <CallParameter functionParameter="FunctionParameter_294">
              <SourceParameter reference="ModelValue_7"/>
            </CallParameter>
            <CallParameter functionParameter="FunctionParameter_317">
              <SourceParameter reference="ModelValue_8"/>
            </CallParameter>
            <CallParameter functionParameter="FunctionParameter_319">
              <SourceParameter reference="ModelValue_5"/>
            </CallParameter>
          </ListOfCallParameters>
        </KineticLaw>
      </Reaction>
      <Reaction key="Reaction_1" name="PGMA" reversible="true" fast="false">
        <MiriamAnnotation>
<rdf:RDF xmlns:dcterms="http://purl.org/dc/terms/" xmlns:rdf="http://www.w3.org/1999/02/22-rdf-syntax-ns#">
  <rdf:Description rdf:about="#Reaction_1">
    <dcterms:created>
      <rdf:Description>
        <dcterms:W3CDTF>2016-04-20T11:12:21Z</dcterms:W3CDTF>
      </rdf:Description>
    </dcterms:created>
  </rdf:Description>
</rdf:RDF>
        </MiriamAnnotation>
        <ListOfSubstrates>
          <Substrate metabolite="Metabolite_9" stoichiometry="1"/>
        </ListOfSubstrates>
        <ListOfProducts>
          <Product metabolite="Metabolite_15" stoichiometry="1"/>
        </ListOfProducts>
        <ListOfConstants>
          <Constant key="Parameter_4389" name="VmPGMA" value="56"/>
          <Constant key="Parameter_4388" name="KmPGMAP3G" value="1.2"/>
          <Constant key="Parameter_4387" name="KeqPGMA" value="0.19"/>
          <Constant key="Parameter_4386" name="KmPGMAP2G" value="0.08"/>
        </ListOfConstants>
        <KineticLaw function="Function_41">
          <ListOfCallParameters>
            <CallParameter functionParameter="FunctionParameter_271">
              <SourceParameter reference="ModelValue_28"/>
            </CallParameter>
            <CallParameter functionParameter="FunctionParameter_267">
              <SourceParameter reference="ModelValue_26"/>
            </CallParameter>
            <CallParameter functionParameter="FunctionParameter_246">
              <SourceParameter reference="Metabolite_9"/>
            </CallParameter>
            <CallParameter functionParameter="FunctionParameter_272">
              <SourceParameter reference="Metabolite_15"/>
            </CallParameter>
            <CallParameter functionParameter="FunctionParameter_274">
              <SourceParameter reference="ModelValue_29"/>
            </CallParameter>
            <CallParameter functionParameter="FunctionParameter_276">
              <SourceParameter reference="ModelValue_27"/>
            </CallParameter>
          </ListOfCallParameters>
        </KineticLaw>
      </Reaction>
      <Reaction key="Reaction_2" name="PYK" reversible="true" fast="false">
        <MiriamAnnotation>
<rdf:RDF xmlns:dcterms="http://purl.org/dc/terms/" xmlns:rdf="http://www.w3.org/1999/02/22-rdf-syntax-ns#">
  <rdf:Description rdf:about="#Reaction_2">
    <dcterms:created>
      <rdf:Description>
        <dcterms:W3CDTF>2016-04-22T11:03:25Z</dcterms:W3CDTF>
      </rdf:Description>
    </dcterms:created>
  </rdf:Description>
</rdf:RDF>
        </MiriamAnnotation>
        <ListOfSubstrates>
          <Substrate metabolite="Metabolite_1" stoichiometry="1"/>
          <Substrate metabolite="Metabolite_11" stoichiometry="1"/>
        </ListOfSubstrates>
        <ListOfProducts>
          <Product metabolite="Metabolite_3" stoichiometry="1"/>
          <Product metabolite="Metabolite_13" stoichiometry="1"/>
        </ListOfProducts>
        <ListOfConstants>
          <Constant key="Parameter_4385" name="VmPYK" value="76"/>
          <Constant key="Parameter_4384" name="KeqPYK" value="6500"/>
          <Constant key="Parameter_4383" name="KmPYKADP" value="0.53"/>
          <Constant key="Parameter_4382" name="KmPYKPEP" value="0.14"/>
          <Constant key="Parameter_4381" name="KmPYKATP" value="1.5"/>
          <Constant key="Parameter_4380" name="KmPYKPYR" value="21"/>
        </ListOfConstants>
        <KineticLaw function="Function_42">
          <ListOfCallParameters>
            <CallParameter functionParameter="FunctionParameter_277">
              <SourceParameter reference="ModelValue_19"/>
            </CallParameter>
            <CallParameter functionParameter="FunctionParameter_273">
              <SourceParameter reference="Metabolite_1"/>
            </CallParameter>
            <CallParameter functionParameter="FunctionParameter_265">
              <SourceParameter reference="Metabolite_11"/>
            </CallParameter>
            <CallParameter functionParameter="FunctionParameter_278">
              <SourceParameter reference="ModelValue_20"/>
            </CallParameter>
            <CallParameter functionParameter="FunctionParameter_280">
              <SourceParameter reference="ModelValue_22"/>
            </CallParameter>
            <CallParameter functionParameter="FunctionParameter_282">
              <SourceParameter reference="Metabolite_3"/>
            </CallParameter>
            <CallParameter functionParameter="FunctionParameter_284">
              <SourceParameter reference="Metabolite_13"/>
            </CallParameter>
            <CallParameter functionParameter="FunctionParameter_286">
              <SourceParameter reference="ModelValue_31"/>
            </CallParameter>
            <CallParameter functionParameter="FunctionParameter_288">
              <SourceParameter reference="ModelValue_21"/>
            </CallParameter>
            <CallParameter functionParameter="FunctionParameter_290">
              <SourceParameter reference="ModelValue_30"/>
            </CallParameter>
          </ListOfCallParameters>
        </KineticLaw>
      </Reaction>
      <Reaction key="Reaction_3" name="ENO" reversible="true" fast="false">
        <MiriamAnnotation>
<rdf:RDF xmlns:dcterms="http://purl.org/dc/terms/" xmlns:rdf="http://www.w3.org/1999/02/22-rdf-syntax-ns#">
  <rdf:Description rdf:about="#Reaction_3">
    <dcterms:created>
      <rdf:Description>
        <dcterms:W3CDTF>2016-11-28T10:29:35Z</dcterms:W3CDTF>
      </rdf:Description>
    </dcterms:created>
  </rdf:Description>
</rdf:RDF>
        </MiriamAnnotation>
        <ListOfSubstrates>
          <Substrate metabolite="Metabolite_15" stoichiometry="1"/>
        </ListOfSubstrates>
        <ListOfProducts>
          <Product metabolite="Metabolite_11" stoichiometry="1"/>
        </ListOfProducts>
        <ListOfConstants>
          <Constant key="Parameter_4379" name="VmENO" value="20.5"/>
          <Constant key="Parameter_4378" name="KmENOP2G" value="0.04"/>
          <Constant key="Parameter_4377" name="KeqENO" value="6.7"/>
          <Constant key="Parameter_4376" name="KmENOPEP" value="0.5"/>
        </ListOfConstants>
        <KineticLaw function="Function_40">
          <ListOfCallParameters>
            <CallParameter functionParameter="FunctionParameter_264">
              <SourceParameter reference="ModelValue_18"/>
            </CallParameter>
            <CallParameter functionParameter="FunctionParameter_254">
              <SourceParameter reference="ModelValue_16"/>
            </CallParameter>
            <CallParameter functionParameter="FunctionParameter_258">
              <SourceParameter reference="Metabolite_15"/>
            </CallParameter>
            <CallParameter functionParameter="FunctionParameter_266">
              <SourceParameter reference="Metabolite_11"/>
            </CallParameter>
            <CallParameter functionParameter="FunctionParameter_268">
              <SourceParameter reference="ModelValue_15"/>
            </CallParameter>
            <CallParameter functionParameter="FunctionParameter_270">
              <SourceParameter reference="ModelValue_17"/>
            </CallParameter>
          </ListOfCallParameters>
        </KineticLaw>
      </Reaction>
      <Reaction key="Reaction_4" name="GAPN" reversible="false" fast="false">
        <MiriamAnnotation>
<rdf:RDF xmlns:dcterms="http://purl.org/dc/terms/" xmlns:rdf="http://www.w3.org/1999/02/22-rdf-syntax-ns#">
  <rdf:Description rdf:about="#Reaction_4">
    <dcterms:created>
      <rdf:Description>
        <dcterms:W3CDTF>2016-11-28T10:48:53Z</dcterms:W3CDTF>
      </rdf:Description>
    </dcterms:created>
  </rdf:Description>
</rdf:RDF>
        </MiriamAnnotation>
        <ListOfSubstrates>
          <Substrate metabolite="Metabolite_7" stoichiometry="1"/>
          <Substrate metabolite="Metabolite_19" stoichiometry="1"/>
        </ListOfSubstrates>
        <ListOfProducts>
          <Product metabolite="Metabolite_9" stoichiometry="1"/>
          <Product metabolite="Metabolite_21" stoichiometry="1"/>
        </ListOfProducts>
        <ListOfConstants>
          <Constant key="Parameter_4375" name="VmGAPN" value="0"/>
          <Constant key="Parameter_4374" name="KmGAPNGAP" value="0.02"/>
          <Constant key="Parameter_4373" name="KmGAPNNADP" value="0.09"/>
        </ListOfConstants>
        <KineticLaw function="Function_43">
          <ListOfCallParameters>
            <CallParameter functionParameter="FunctionParameter_291">
              <SourceParameter reference="ModelValue_23"/>
            </CallParameter>
            <CallParameter functionParameter="FunctionParameter_287">
              <SourceParameter reference="Metabolite_7"/>
            </CallParameter>
            <CallParameter functionParameter="FunctionParameter_283">
              <SourceParameter reference="Metabolite_19"/>
            </CallParameter>
            <CallParameter functionParameter="FunctionParameter_279">
              <SourceParameter reference="ModelValue_24"/>
            </CallParameter>
            <CallParameter functionParameter="FunctionParameter_262">
              <SourceParameter reference="ModelValue_25"/>
            </CallParameter>
          </ListOfCallParameters>
        </KineticLaw>
      </Reaction>
      <Reaction key="Reaction_5" name="GAPDH" reversible="true" fast="false">
        <MiriamAnnotation>
<rdf:RDF xmlns:dcterms="http://purl.org/dc/terms/" xmlns:rdf="http://www.w3.org/1999/02/22-rdf-syntax-ns#">
  <rdf:Description rdf:about="#Reaction_5">
    <dcterms:created>
      <rdf:Description>
        <dcterms:W3CDTF>2016-11-28T11:11:39Z</dcterms:W3CDTF>
      </rdf:Description>
    </dcterms:created>
  </rdf:Description>
</rdf:RDF>
        </MiriamAnnotation>
        <ListOfSubstrates>
          <Substrate metabolite="Metabolite_7" stoichiometry="1"/>
          <Substrate metabolite="Metabolite_19" stoichiometry="1"/>
          <Substrate metabolite="Metabolite_17" stoichiometry="1"/>
        </ListOfSubstrates>
        <ListOfProducts>
          <Product metabolite="Metabolite_5" stoichiometry="1"/>
          <Product metabolite="Metabolite_21" stoichiometry="1"/>
        </ListOfProducts>
        <ListOfConstants>
          <Constant key="Parameter_4372" name="VmGAPDH" value="660"/>
          <Constant key="Parameter_4371" name="KmGAPDHGAP" value="3.1091"/>
          <Constant key="Parameter_4370" name="KmGAPDHNADP" value="0.204"/>
          <Constant key="Parameter_4369" name="KmPhosphate" value="108.32"/>
          <Constant key="Parameter_4368" name="KeqGAPDH" value="0.000185"/>
          <Constant key="Parameter_4367" name="KmGAPDHNADPH" value="0.09445"/>
          <Constant key="Parameter_4366" name="KmGAPDHBPG" value="0.089"/>
        </ListOfConstants>
        <KineticLaw function="Function_44">
          <ListOfCallParameters>
            <CallParameter functionParameter="FunctionParameter_275">
              <SourceParameter reference="ModelValue_11"/>
            </CallParameter>
            <CallParameter functionParameter="FunctionParameter_281">
              <SourceParameter reference="Metabolite_7"/>
            </CallParameter>
            <CallParameter functionParameter="FunctionParameter_289">
              <SourceParameter reference="Metabolite_19"/>
            </CallParameter>
            <CallParameter functionParameter="FunctionParameter_293">
              <SourceParameter reference="Metabolite_17"/>
            </CallParameter>
            <CallParameter functionParameter="FunctionParameter_295">
              <SourceParameter reference="ModelValue_1"/>
            </CallParameter>
            <CallParameter functionParameter="FunctionParameter_297">
              <SourceParameter reference="ModelValue_3"/>
            </CallParameter>
            <CallParameter functionParameter="FunctionParameter_299">
              <SourceParameter reference="ModelValue_35"/>
            </CallParameter>
            <CallParameter functionParameter="FunctionParameter_301">
              <SourceParameter reference="Metabolite_5"/>
            </CallParameter>
            <CallParameter functionParameter="FunctionParameter_303">
              <SourceParameter reference="Metabolite_21"/>
            </CallParameter>
            <CallParameter functionParameter="FunctionParameter_305">
              <SourceParameter reference="ModelValue_33"/>
            </CallParameter>
            <CallParameter functionParameter="FunctionParameter_307">
              <SourceParameter reference="ModelValue_4"/>
            </CallParameter>
            <CallParameter functionParameter="FunctionParameter_309">
              <SourceParameter reference="ModelValue_0"/>
            </CallParameter>
          </ListOfCallParameters>
        </KineticLaw>
      </Reaction>
      <Reaction key="Reaction_6" name="Spontenous degradation " reversible="false" fast="false">
        <MiriamAnnotation>
<rdf:RDF xmlns:dcterms="http://purl.org/dc/terms/" xmlns:rdf="http://www.w3.org/1999/02/22-rdf-syntax-ns#">
  <rdf:Description rdf:about="#Reaction_6">
    <dcterms:created>
      <rdf:Description>
        <dcterms:W3CDTF>2016-11-28T11:23:20Z</dcterms:W3CDTF>
      </rdf:Description>
    </dcterms:created>
  </rdf:Description>
</rdf:RDF>
        </MiriamAnnotation>
        <ListOfSubstrates>
          <Substrate metabolite="Metabolite_5" stoichiometry="1"/>
        </ListOfSubstrates>
        <ListOfProducts>
          <Product metabolite="Metabolite_9" stoichiometry="1"/>
        </ListOfProducts>
        <ListOfConstants>
          <Constant key="Parameter_4365" name="KdBPG" value="10.5824"/>
        </ListOfConstants>
        <KineticLaw function="Function_46">
          <ListOfCallParameters>
            <CallParameter functionParameter="FunctionParameter_320">
              <SourceParameter reference="ModelValue_13"/>
            </CallParameter>
            <CallParameter functionParameter="FunctionParameter_316">
              <SourceParameter reference="Metabolite_5"/>
            </CallParameter>
          </ListOfCallParameters>
        </KineticLaw>
      </Reaction>
      <Reaction key="Reaction_7" name="Atpase" reversible="false" fast="false">
        <MiriamAnnotation>
<rdf:RDF xmlns:dcterms="http://purl.org/dc/terms/" xmlns:rdf="http://www.w3.org/1999/02/22-rdf-syntax-ns#">
  <rdf:Description rdf:about="#Reaction_7">
    <dcterms:created>
      <rdf:Description>
        <dcterms:W3CDTF>2016-12-21T11:26:13Z</dcterms:W3CDTF>
      </rdf:Description>
    </dcterms:created>
  </rdf:Description>
</rdf:RDF>
        </MiriamAnnotation>
        <ListOfSubstrates>
          <Substrate metabolite="Metabolite_3" stoichiometry="1"/>
        </ListOfSubstrates>
        <ListOfProducts>
          <Product metabolite="Metabolite_1" stoichiometry="1"/>
        </ListOfProducts>
        <ListOfConstants>
          <Constant key="Parameter_4364" name="k1" value="3.5833"/>
        </ListOfConstants>
        <KineticLaw function="Function_13">
          <ListOfCallParameters>
            <CallParameter functionParameter="FunctionParameter_81">
              <SourceParameter reference="ModelValue_32"/>
            </CallParameter>
            <CallParameter functionParameter="FunctionParameter_79">
              <SourceParameter reference="Metabolite_3"/>
            </CallParameter>
          </ListOfCallParameters>
        </KineticLaw>
      </Reaction>
    </ListOfReactions>
    <ListOfModelParameterSets activeSet="ModelParameterSet_1">
      <ModelParameterSet key="ModelParameterSet_1" name="Initial State">
        <ModelParameterGroup cn="String=Initial Time" type="Group">
          <ModelParameter cn="CN=Root,Model=Yanfei" value="0" type="Model" simulationType="time"/>
        </ModelParameterGroup>
        <ModelParameterGroup cn="String=Initial Compartment Sizes" type="Group">
          <ModelParameter cn="CN=Root,Model=Yanfei,Vector=Compartments[default_compartment]" value="1" type="Compartment" simulationType="fixed"/>
        </ModelParameterGroup>
        <ModelParameterGroup cn="String=Initial Species Values" type="Group">
          <ModelParameter cn="CN=Root,Model=Yanfei,Vector=Compartments[default_compartment],Vector=Metabolites[ADP]" value="7.949227162800002e+020" type="Species" simulationType="reactions"/>
          <ModelParameter cn="CN=Root,Model=Yanfei,Vector=Compartments[default_compartment],Vector=Metabolites[ATP]" value="1.51757973108e+021" type="Species" simulationType="reactions"/>
          <ModelParameter cn="CN=Root,Model=Yanfei,Vector=Compartments[default_compartment],Vector=Metabolites[BPG]" value="0" type="Species" simulationType="reactions"/>
          <ModelParameter cn="CN=Root,Model=Yanfei,Vector=Compartments[default_compartment],Vector=Metabolites[GAP]" value="9.033212685000011e+020" type="Species" simulationType="fixed"/>
          <ModelParameter cn="CN=Root,Model=Yanfei,Vector=Compartments[default_compartment],Vector=Metabolites[3PG]" value="0" type="Species" simulationType="reactions"/>
          <ModelParameter cn="CN=Root,Model=Yanfei,Vector=Compartments[default_compartment],Vector=Metabolites[PEP]" value="0" type="Species" simulationType="reactions"/>
          <ModelParameter cn="CN=Root,Model=Yanfei,Vector=Compartments[default_compartment],Vector=Metabolites[PYR]" value="1.11409623115e+021" type="Species" simulationType="fixed"/>
          <ModelParameter cn="CN=Root,Model=Yanfei,Vector=Compartments[default_compartment],Vector=Metabolites[2PG]" value="0" type="Species" simulationType="reactions"/>
          <ModelParameter cn="CN=Root,Model=Yanfei,Vector=Compartments[default_compartment],Vector=Metabolites[Phosphate]" value="6.022141790000004e+022" type="Species" simulationType="fixed"/>
          <ModelParameter cn="CN=Root,Model=Yanfei,Vector=Compartments[default_compartment],Vector=Metabolites[NADP]" value="9.575205446100002e+020" type="Species" simulationType="fixed"/>
          <ModelParameter cn="CN=Root,Model=Yanfei,Vector=Compartments[default_compartment],Vector=Metabolites[NADPH]" value="6.022141790000001e+019" type="Species" simulationType="fixed"/>
        </ModelParameterGroup>
        <ModelParameterGroup cn="String=Initial Global Quantities" type="Group">
          <ModelParameter cn="CN=Root,Model=Yanfei,Vector=Values[KmGAPDHBPG]" value="0.089" type="ModelValue" simulationType="fixed"/>
          <ModelParameter cn="CN=Root,Model=Yanfei,Vector=Values[KmGAPDHGAP]" value="3.1091" type="ModelValue" simulationType="fixed"/>
          <ModelParameter cn="CN=Root,Model=Yanfei,Vector=Values[KiADP]" value="1.14174" type="ModelValue" simulationType="fixed"/>
          <ModelParameter cn="CN=Root,Model=Yanfei,Vector=Values[KmGAPDHNADP]" value="0.204" type="ModelValue" simulationType="fixed"/>
          <ModelParameter cn="CN=Root,Model=Yanfei,Vector=Values[KmGAPDHNADPH]" value="0.09445000000000001" type="ModelValue" simulationType="fixed"/>
          <ModelParameter cn="CN=Root,Model=Yanfei,Vector=Values[KmPGKADP]" value="0.374" type="ModelValue" simulationType="fixed"/>
          <ModelParameter cn="CN=Root,Model=Yanfei,Vector=Values[KmPGKATP]" value="9.303000000000001" type="ModelValue" simulationType="fixed"/>
          <ModelParameter cn="CN=Root,Model=Yanfei,Vector=Values[KmPGKP3G]" value="0.567" type="ModelValue" simulationType="fixed"/>
          <ModelParameter cn="CN=Root,Model=Yanfei,Vector=Values[KmPGKBPG]" value="0.008200000000000001" type="ModelValue" simulationType="fixed"/>
          <ModelParameter cn="CN=Root,Model=Yanfei,Vector=Values[Kpi]" value="408.523" type="ModelValue" simulationType="fixed"/>
          <ModelParameter cn="CN=Root,Model=Yanfei,Vector=Values[VmPGKr]" value="73" type="ModelValue" simulationType="fixed"/>
          <ModelParameter cn="CN=Root,Model=Yanfei,Vector=Values[VmGAPDHf]" value="660" type="ModelValue" simulationType="fixed"/>
          <ModelParameter cn="CN=Root,Model=Yanfei,Vector=Values[kPK]" value="0" type="ModelValue" simulationType="fixed"/>
          <ModelParameter cn="CN=Root,Model=Yanfei,Vector=Values[kdBPG]" value="10.5824" type="ModelValue" simulationType="fixed"/>
          <ModelParameter cn="CN=Root,Model=Yanfei,Vector=Values[n]" value="1.56416" type="ModelValue" simulationType="fixed"/>
          <ModelParameter cn="CN=Root,Model=Yanfei,Vector=Values[KeqENO]" value="6.7" type="ModelValue" simulationType="fixed"/>
          <ModelParameter cn="CN=Root,Model=Yanfei,Vector=Values[KmENOK2PG]" value="0.04" type="ModelValue" simulationType="fixed"/>
          <ModelParameter cn="CN=Root,Model=Yanfei,Vector=Values[KmENOKPEP]" value="0.5" type="ModelValue" simulationType="fixed"/>
          <ModelParameter cn="CN=Root,Model=Yanfei,Vector=Values[VmENO]" value="20.5" type="ModelValue" simulationType="fixed"/>
          <ModelParameter cn="CN=Root,Model=Yanfei,Vector=Values[VmPYK]" value="76" type="ModelValue" simulationType="fixed"/>
          <ModelParameter cn="CN=Root,Model=Yanfei,Vector=Values[KmPYKADP]" value="0.53" type="ModelValue" simulationType="fixed"/>
          <ModelParameter cn="CN=Root,Model=Yanfei,Vector=Values[KmPYKATP]" value="1.5" type="ModelValue" simulationType="fixed"/>
          <ModelParameter cn="CN=Root,Model=Yanfei,Vector=Values[KmPYKPEP]" value="0.14" type="ModelValue" simulationType="fixed"/>
          <ModelParameter cn="CN=Root,Model=Yanfei,Vector=Values[VmGAPN]" value="0" type="ModelValue" simulationType="fixed"/>
          <ModelParameter cn="CN=Root,Model=Yanfei,Vector=Values[KmGAPNGAP]" value="0.02" type="ModelValue" simulationType="fixed"/>
          <ModelParameter cn="CN=Root,Model=Yanfei,Vector=Values[KmGAPNNADP]" value="0.09" type="ModelValue" simulationType="fixed"/>
          <ModelParameter cn="CN=Root,Model=Yanfei,Vector=Values[KmPGMA3PG]" value="1.2" type="ModelValue" simulationType="fixed"/>
          <ModelParameter cn="CN=Root,Model=Yanfei,Vector=Values[KmPGMA2PG]" value="0.08" type="ModelValue" simulationType="fixed"/>
          <ModelParameter cn="CN=Root,Model=Yanfei,Vector=Values[VmPGMA]" value="56" type="ModelValue" simulationType="fixed"/>
          <ModelParameter cn="CN=Root,Model=Yanfei,Vector=Values[KeqPGMA]" value="0.19" type="ModelValue" simulationType="fixed"/>
          <ModelParameter cn="CN=Root,Model=Yanfei,Vector=Values[KmPYKPYR]" value="21" type="ModelValue" simulationType="fixed"/>
          <ModelParameter cn="CN=Root,Model=Yanfei,Vector=Values[KeqPYK]" value="6500" type="ModelValue" simulationType="fixed"/>
          <ModelParameter cn="CN=Root,Model=Yanfei,Vector=Values[KATPase]" value="3.5833" type="ModelValue" simulationType="fixed"/>
          <ModelParameter cn="CN=Root,Model=Yanfei,Vector=Values[KeqGAPDH]" value="0.000185" type="ModelValue" simulationType="fixed"/>
          <ModelParameter cn="CN=Root,Model=Yanfei,Vector=Values[KeqPGK]" value="3793" type="ModelValue" simulationType="fixed"/>
          <ModelParameter cn="CN=Root,Model=Yanfei,Vector=Values[KmGAPDHPhosphate]" value="108.32" type="ModelValue" simulationType="fixed"/>
          <ModelParameter cn="CN=Root,Model=Yanfei,Vector=Values[ATP consumption flux/ Pyruvate flux ]" value="NaN" type="ModelValue" simulationType="assignment"/>
          <ModelParameter cn="CN=Root,Model=Yanfei,Vector=Values[ATP/ADP ratio]" value="1.909090909090909" type="ModelValue" simulationType="assignment"/>
        </ModelParameterGroup>
        <ModelParameterGroup cn="String=Kinetic Parameters" type="Group">
          <ModelParameterGroup cn="CN=Root,Model=Yanfei,Vector=Reactions[PGK]" type="Reaction">
            <ModelParameter cn="CN=Root,Model=Yanfei,Vector=Reactions[PGK],ParameterGroup=Parameters,Parameter=VmPGK" value="73" type="ReactionParameter" simulationType="assignment">
              <InitialExpression>
                &lt;CN=Root,Model=Yanfei,Vector=Values[VmPGKr],Reference=InitialValue&gt;
              </InitialExpression>
            </ModelParameter>
            <ModelParameter cn="CN=Root,Model=Yanfei,Vector=Reactions[PGK],ParameterGroup=Parameters,Parameter=KeqPGK" value="3793" type="ReactionParameter" simulationType="assignment">
              <InitialExpression>
                &lt;CN=Root,Model=Yanfei,Vector=Values[KeqPGK],Reference=InitialValue&gt;
              </InitialExpression>
            </ModelParameter>
            <ModelParameter cn="CN=Root,Model=Yanfei,Vector=Reactions[PGK],ParameterGroup=Parameters,Parameter=KmPGKATP" value="9.303000000000001" type="ReactionParameter" simulationType="assignment">
              <InitialExpression>
                &lt;CN=Root,Model=Yanfei,Vector=Values[KmPGKATP],Reference=InitialValue&gt;
              </InitialExpression>
            </ModelParameter>
            <ModelParameter cn="CN=Root,Model=Yanfei,Vector=Reactions[PGK],ParameterGroup=Parameters,Parameter=KiADP" value="1.14174" type="ReactionParameter" simulationType="assignment">
              <InitialExpression>
                &lt;CN=Root,Model=Yanfei,Vector=Values[KiADP],Reference=InitialValue&gt;
              </InitialExpression>
            </ModelParameter>
            <ModelParameter cn="CN=Root,Model=Yanfei,Vector=Reactions[PGK],ParameterGroup=Parameters,Parameter=KmPGKP3G" value="0.567" type="ReactionParameter" simulationType="assignment">
              <InitialExpression>
                &lt;CN=Root,Model=Yanfei,Vector=Values[KmPGKP3G],Reference=InitialValue&gt;
              </InitialExpression>
            </ModelParameter>
            <ModelParameter cn="CN=Root,Model=Yanfei,Vector=Reactions[PGK],ParameterGroup=Parameters,Parameter=KmPGKBPG" value="0.008200000000000001" type="ReactionParameter" simulationType="assignment">
              <InitialExpression>
                &lt;CN=Root,Model=Yanfei,Vector=Values[KmPGKBPG],Reference=InitialValue&gt;
              </InitialExpression>
            </ModelParameter>
            <ModelParameter cn="CN=Root,Model=Yanfei,Vector=Reactions[PGK],ParameterGroup=Parameters,Parameter=KmPGKADP" value="0.374" type="ReactionParameter" simulationType="assignment">
              <InitialExpression>
                &lt;CN=Root,Model=Yanfei,Vector=Values[KmPGKADP],Reference=InitialValue&gt;
              </InitialExpression>
            </ModelParameter>
          </ModelParameterGroup>
          <ModelParameterGroup cn="CN=Root,Model=Yanfei,Vector=Reactions[PGMA]" type="Reaction">
            <ModelParameter cn="CN=Root,Model=Yanfei,Vector=Reactions[PGMA],ParameterGroup=Parameters,Parameter=VmPGMA" value="56" type="ReactionParameter" simulationType="assignment">
              <InitialExpression>
                &lt;CN=Root,Model=Yanfei,Vector=Values[VmPGMA],Reference=InitialValue&gt;
              </InitialExpression>
            </ModelParameter>
            <ModelParameter cn="CN=Root,Model=Yanfei,Vector=Reactions[PGMA],ParameterGroup=Parameters,Parameter=KmPGMAP3G" value="1.2" type="ReactionParameter" simulationType="assignment">
              <InitialExpression>
                &lt;CN=Root,Model=Yanfei,Vector=Values[KmPGMA3PG],Reference=InitialValue&gt;
              </InitialExpression>
            </ModelParameter>
            <ModelParameter cn="CN=Root,Model=Yanfei,Vector=Reactions[PGMA],ParameterGroup=Parameters,Parameter=KeqPGMA" value="0.19" type="ReactionParameter" simulationType="assignment">
              <InitialExpression>
                &lt;CN=Root,Model=Yanfei,Vector=Values[KeqPGMA],Reference=InitialValue&gt;
              </InitialExpression>
            </ModelParameter>
            <ModelParameter cn="CN=Root,Model=Yanfei,Vector=Reactions[PGMA],ParameterGroup=Parameters,Parameter=KmPGMAP2G" value="0.08" type="ReactionParameter" simulationType="assignment">
              <InitialExpression>
                &lt;CN=Root,Model=Yanfei,Vector=Values[KmPGMA2PG],Reference=InitialValue&gt;
              </InitialExpression>
            </ModelParameter>
          </ModelParameterGroup>
          <ModelParameterGroup cn="CN=Root,Model=Yanfei,Vector=Reactions[PYK]" type="Reaction">
            <ModelParameter cn="CN=Root,Model=Yanfei,Vector=Reactions[PYK],ParameterGroup=Parameters,Parameter=VmPYK" value="76" type="ReactionParameter" simulationType="assignment">
              <InitialExpression>
                &lt;CN=Root,Model=Yanfei,Vector=Values[VmPYK],Reference=InitialValue&gt;
              </InitialExpression>
            </ModelParameter>
            <ModelParameter cn="CN=Root,Model=Yanfei,Vector=Reactions[PYK],ParameterGroup=Parameters,Parameter=KeqPYK" value="6500" type="ReactionParameter" simulationType="assignment">
              <InitialExpression>
                &lt;CN=Root,Model=Yanfei,Vector=Values[KeqPYK],Reference=InitialValue&gt;
              </InitialExpression>
            </ModelParameter>
            <ModelParameter cn="CN=Root,Model=Yanfei,Vector=Reactions[PYK],ParameterGroup=Parameters,Parameter=KmPYKADP" value="0.53" type="ReactionParameter" simulationType="assignment">
              <InitialExpression>
                &lt;CN=Root,Model=Yanfei,Vector=Values[KmPYKADP],Reference=InitialValue&gt;
              </InitialExpression>
            </ModelParameter>
            <ModelParameter cn="CN=Root,Model=Yanfei,Vector=Reactions[PYK],ParameterGroup=Parameters,Parameter=KmPYKPEP" value="0.14" type="ReactionParameter" simulationType="assignment">
              <InitialExpression>
                &lt;CN=Root,Model=Yanfei,Vector=Values[KmPYKPEP],Reference=InitialValue&gt;
              </InitialExpression>
            </ModelParameter>
            <ModelParameter cn="CN=Root,Model=Yanfei,Vector=Reactions[PYK],ParameterGroup=Parameters,Parameter=KmPYKATP" value="1.5" type="ReactionParameter" simulationType="assignment">
              <InitialExpression>
                &lt;CN=Root,Model=Yanfei,Vector=Values[KmPYKATP],Reference=InitialValue&gt;
              </InitialExpression>
            </ModelParameter>
            <ModelParameter cn="CN=Root,Model=Yanfei,Vector=Reactions[PYK],ParameterGroup=Parameters,Parameter=KmPYKPYR" value="21" type="ReactionParameter" simulationType="assignment">
              <InitialExpression>
                &lt;CN=Root,Model=Yanfei,Vector=Values[KmPYKPYR],Reference=InitialValue&gt;
              </InitialExpression>
            </ModelParameter>
          </ModelParameterGroup>
          <ModelParameterGroup cn="CN=Root,Model=Yanfei,Vector=Reactions[ENO]" type="Reaction">
            <ModelParameter cn="CN=Root,Model=Yanfei,Vector=Reactions[ENO],ParameterGroup=Parameters,Parameter=VmENO" value="20.5" type="ReactionParameter" simulationType="assignment">
              <InitialExpression>
                &lt;CN=Root,Model=Yanfei,Vector=Values[VmENO],Reference=InitialValue&gt;
              </InitialExpression>
            </ModelParameter>
            <ModelParameter cn="CN=Root,Model=Yanfei,Vector=Reactions[ENO],ParameterGroup=Parameters,Parameter=KmENOP2G" value="0.04" type="ReactionParameter" simulationType="assignment">
              <InitialExpression>
                &lt;CN=Root,Model=Yanfei,Vector=Values[KmENOK2PG],Reference=InitialValue&gt;
              </InitialExpression>
            </ModelParameter>
            <ModelParameter cn="CN=Root,Model=Yanfei,Vector=Reactions[ENO],ParameterGroup=Parameters,Parameter=KeqENO" value="6.7" type="ReactionParameter" simulationType="assignment">
              <InitialExpression>
                &lt;CN=Root,Model=Yanfei,Vector=Values[KeqENO],Reference=InitialValue&gt;
              </InitialExpression>
            </ModelParameter>
            <ModelParameter cn="CN=Root,Model=Yanfei,Vector=Reactions[ENO],ParameterGroup=Parameters,Parameter=KmENOPEP" value="0.5" type="ReactionParameter" simulationType="assignment">
              <InitialExpression>
                &lt;CN=Root,Model=Yanfei,Vector=Values[KmENOKPEP],Reference=InitialValue&gt;
              </InitialExpression>
            </ModelParameter>
          </ModelParameterGroup>
          <ModelParameterGroup cn="CN=Root,Model=Yanfei,Vector=Reactions[GAPN]" type="Reaction">
            <ModelParameter cn="CN=Root,Model=Yanfei,Vector=Reactions[GAPN],ParameterGroup=Parameters,Parameter=VmGAPN" value="0" type="ReactionParameter" simulationType="assignment">
              <InitialExpression>
                &lt;CN=Root,Model=Yanfei,Vector=Values[VmGAPN],Reference=InitialValue&gt;
              </InitialExpression>
            </ModelParameter>
            <ModelParameter cn="CN=Root,Model=Yanfei,Vector=Reactions[GAPN],ParameterGroup=Parameters,Parameter=KmGAPNGAP" value="0.02" type="ReactionParameter" simulationType="assignment">
              <InitialExpression>
                &lt;CN=Root,Model=Yanfei,Vector=Values[KmGAPNGAP],Reference=InitialValue&gt;
              </InitialExpression>
            </ModelParameter>
            <ModelParameter cn="CN=Root,Model=Yanfei,Vector=Reactions[GAPN],ParameterGroup=Parameters,Parameter=KmGAPNNADP" value="0.09" type="ReactionParameter" simulationType="assignment">
              <InitialExpression>
                &lt;CN=Root,Model=Yanfei,Vector=Values[KmGAPNNADP],Reference=InitialValue&gt;
              </InitialExpression>
            </ModelParameter>
          </ModelParameterGroup>
          <ModelParameterGroup cn="CN=Root,Model=Yanfei,Vector=Reactions[GAPDH]" type="Reaction">
            <ModelParameter cn="CN=Root,Model=Yanfei,Vector=Reactions[GAPDH],ParameterGroup=Parameters,Parameter=VmGAPDH" value="660" type="ReactionParameter" simulationType="assignment">
              <InitialExpression>
                &lt;CN=Root,Model=Yanfei,Vector=Values[VmGAPDHf],Reference=InitialValue&gt;
              </InitialExpression>
            </ModelParameter>
            <ModelParameter cn="CN=Root,Model=Yanfei,Vector=Reactions[GAPDH],ParameterGroup=Parameters,Parameter=KmGAPDHGAP" value="3.1091" type="ReactionParameter" simulationType="assignment">
              <InitialExpression>
                &lt;CN=Root,Model=Yanfei,Vector=Values[KmGAPDHGAP],Reference=InitialValue&gt;
              </InitialExpression>
            </ModelParameter>
            <ModelParameter cn="CN=Root,Model=Yanfei,Vector=Reactions[GAPDH],ParameterGroup=Parameters,Parameter=KmGAPDHNADP" value="0.204" type="ReactionParameter" simulationType="assignment">
              <InitialExpression>
                &lt;CN=Root,Model=Yanfei,Vector=Values[KmGAPDHNADP],Reference=InitialValue&gt;
              </InitialExpression>
            </ModelParameter>
            <ModelParameter cn="CN=Root,Model=Yanfei,Vector=Reactions[GAPDH],ParameterGroup=Parameters,Parameter=KmPhosphate" value="108.32" type="ReactionParameter" simulationType="assignment">
              <InitialExpression>
                &lt;CN=Root,Model=Yanfei,Vector=Values[KmGAPDHPhosphate],Reference=InitialValue&gt;
              </InitialExpression>
            </ModelParameter>
            <ModelParameter cn="CN=Root,Model=Yanfei,Vector=Reactions[GAPDH],ParameterGroup=Parameters,Parameter=KeqGAPDH" value="0.000185" type="ReactionParameter" simulationType="assignment">
              <InitialExpression>
                &lt;CN=Root,Model=Yanfei,Vector=Values[KeqGAPDH],Reference=InitialValue&gt;
              </InitialExpression>
            </ModelParameter>
            <ModelParameter cn="CN=Root,Model=Yanfei,Vector=Reactions[GAPDH],ParameterGroup=Parameters,Parameter=KmGAPDHNADPH" value="0.09445000000000001" type="ReactionParameter" simulationType="assignment">
              <InitialExpression>
                &lt;CN=Root,Model=Yanfei,Vector=Values[KmGAPDHNADPH],Reference=InitialValue&gt;
              </InitialExpression>
            </ModelParameter>
            <ModelParameter cn="CN=Root,Model=Yanfei,Vector=Reactions[GAPDH],ParameterGroup=Parameters,Parameter=KmGAPDHBPG" value="0.089" type="ReactionParameter" simulationType="assignment">
              <InitialExpression>
                &lt;CN=Root,Model=Yanfei,Vector=Values[KmGAPDHBPG],Reference=InitialValue&gt;
              </InitialExpression>
            </ModelParameter>
          </ModelParameterGroup>
          <ModelParameterGroup cn="CN=Root,Model=Yanfei,Vector=Reactions[Spontenous degradation ]" type="Reaction">
            <ModelParameter cn="CN=Root,Model=Yanfei,Vector=Reactions[Spontenous degradation ],ParameterGroup=Parameters,Parameter=KdBPG" value="10.5824" type="ReactionParameter" simulationType="assignment">
              <InitialExpression>
                &lt;CN=Root,Model=Yanfei,Vector=Values[kdBPG],Reference=InitialValue&gt;
              </InitialExpression>
            </ModelParameter>
          </ModelParameterGroup>
          <ModelParameterGroup cn="CN=Root,Model=Yanfei,Vector=Reactions[Atpase]" type="Reaction">
            <ModelParameter cn="CN=Root,Model=Yanfei,Vector=Reactions[Atpase],ParameterGroup=Parameters,Parameter=k1" value="3.5833" type="ReactionParameter" simulationType="assignment">
              <InitialExpression>
                &lt;CN=Root,Model=Yanfei,Vector=Values[KATPase],Reference=InitialValue&gt;
              </InitialExpression>
            </ModelParameter>
          </ModelParameterGroup>
        </ModelParameterGroup>
      </ModelParameterSet>
    </ListOfModelParameterSets>
    <StateTemplate>
      <StateTemplateVariable objectReference="Model_3"/>
      <StateTemplateVariable objectReference="Metabolite_9"/>
      <StateTemplateVariable objectReference="Metabolite_3"/>
      <StateTemplateVariable objectReference="Metabolite_5"/>
      <StateTemplateVariable objectReference="Metabolite_11"/>
      <StateTemplateVariable objectReference="Metabolite_15"/>
      <StateTemplateVariable objectReference="Metabolite_1"/>
      <StateTemplateVariable objectReference="ModelValue_36"/>
      <StateTemplateVariable objectReference="ModelValue_37"/>
      <StateTemplateVariable objectReference="Metabolite_7"/>
      <StateTemplateVariable objectReference="Metabolite_13"/>
      <StateTemplateVariable objectReference="Metabolite_17"/>
      <StateTemplateVariable objectReference="Metabolite_19"/>
      <StateTemplateVariable objectReference="Metabolite_21"/>
      <StateTemplateVariable objectReference="Compartment_1"/>
      <StateTemplateVariable objectReference="ModelValue_0"/>
      <StateTemplateVariable objectReference="ModelValue_1"/>
      <StateTemplateVariable objectReference="ModelValue_2"/>
      <StateTemplateVariable objectReference="ModelValue_3"/>
      <StateTemplateVariable objectReference="ModelValue_4"/>
      <StateTemplateVariable objectReference="ModelValue_5"/>
      <StateTemplateVariable objectReference="ModelValue_6"/>
      <StateTemplateVariable objectReference="ModelValue_7"/>
      <StateTemplateVariable objectReference="ModelValue_8"/>
      <StateTemplateVariable objectReference="ModelValue_9"/>
      <StateTemplateVariable objectReference="ModelValue_10"/>
      <StateTemplateVariable objectReference="ModelValue_11"/>
      <StateTemplateVariable objectReference="ModelValue_12"/>
      <StateTemplateVariable objectReference="ModelValue_13"/>
      <StateTemplateVariable objectReference="ModelValue_14"/>
      <StateTemplateVariable objectReference="ModelValue_15"/>
      <StateTemplateVariable objectReference="ModelValue_16"/>
      <StateTemplateVariable objectReference="ModelValue_17"/>
      <StateTemplateVariable objectReference="ModelValue_18"/>
      <StateTemplateVariable objectReference="ModelValue_19"/>
      <StateTemplateVariable objectReference="ModelValue_20"/>
      <StateTemplateVariable objectReference="ModelValue_21"/>
      <StateTemplateVariable objectReference="ModelValue_22"/>
      <StateTemplateVariable objectReference="ModelValue_23"/>
      <StateTemplateVariable objectReference="ModelValue_24"/>
      <StateTemplateVariable objectReference="ModelValue_25"/>
      <StateTemplateVariable objectReference="ModelValue_26"/>
      <StateTemplateVariable objectReference="ModelValue_27"/>
      <StateTemplateVariable objectReference="ModelValue_28"/>
      <StateTemplateVariable objectReference="ModelValue_29"/>
      <StateTemplateVariable objectReference="ModelValue_30"/>
      <StateTemplateVariable objectReference="ModelValue_31"/>
      <StateTemplateVariable objectReference="ModelValue_32"/>
      <StateTemplateVariable objectReference="ModelValue_33"/>
      <StateTemplateVariable objectReference="ModelValue_34"/>
      <StateTemplateVariable objectReference="ModelValue_35"/>
    </StateTemplate>
    <InitialState type="initialState">
      0 0 1.51757973108e+021 0 0 0 7.949227162800002e+020 NaN 1.909090909090909 9.033212685000011e+020 1.11409623115e+021 6.022141790000004e+022 9.575205446100002e+020 6.022141790000001e+019 1 0.089 3.1091 1.14174 0.204 0.09445000000000001 0.374 9.303000000000001 0.567 0.008200000000000001 408.523 73 660 0 10.5824 1.56416 6.7 0.04 0.5 20.5 76 0.53 1.5 0.14 0 0.02 0.09 1.2 0.08 56 0.19 21 6500 3.5833 0.000185 3793 108.32 
    </InitialState>
  </Model>
  <ListOfTasks>
    <Task key="Task_14" name="Steady-State" type="steadyState" scheduled="false" updateModel="false">
      <Report reference="Report_9" target="" append="1" confirmOverwrite="1"/>
      <Problem>
        <Parameter name="JacobianRequested" type="bool" value="1"/>
        <Parameter name="StabilityAnalysisRequested" type="bool" value="1"/>
      </Problem>
      <Method name="Enhanced Newton" type="EnhancedNewton">
        <Parameter name="Resolution" type="unsignedFloat" value="1e-009"/>
        <Parameter name="Derivation Factor" type="unsignedFloat" value="0.001"/>
        <Parameter name="Use Newton" type="bool" value="1"/>
        <Parameter name="Use Integration" type="bool" value="1"/>
        <Parameter name="Use Back Integration" type="bool" value="1"/>
        <Parameter name="Accept Negative Concentrations" type="bool" value="0"/>
        <Parameter name="Iteration Limit" type="unsignedInteger" value="50"/>
        <Parameter name="Maximum duration for forward integration" type="unsignedFloat" value="1000000000"/>
        <Parameter name="Maximum duration for backward integration" type="unsignedFloat" value="1000000"/>
      </Method>
    </Task>
    <Task key="Task_15" name="Time-Course" type="timeCourse" scheduled="false" updateModel="false">
      <Problem>
        <Parameter name="StepNumber" type="unsignedInteger" value="1000"/>
        <Parameter name="StepSize" type="float" value="1"/>
        <Parameter name="Duration" type="float" value="1000"/>
        <Parameter name="TimeSeriesRequested" type="bool" value="1"/>
        <Parameter name="OutputStartTime" type="float" value="0"/>
        <Parameter name="Output Event" type="bool" value="0"/>
        <Parameter name="Continue on Simultaneous Events" type="bool" value="1"/>
      </Problem>
      <Method name="Deterministic (LSODA)" type="Deterministic(LSODA)">
        <Parameter name="Integrate Reduced Model" type="bool" value="0"/>
        <Parameter name="Relative Tolerance" type="unsignedFloat" value="1e-006"/>
        <Parameter name="Absolute Tolerance" type="unsignedFloat" value="1e-012"/>
        <Parameter name="Max Internal Steps" type="unsignedInteger" value="10000"/>
      </Method>
    </Task>
    <Task key="Task_16" name="Scan" type="scan" scheduled="false" updateModel="false">
      <Problem>
        <Parameter name="Subtask" type="unsignedInteger" value="0"/>
        <ParameterGroup name="ScanItems">
          <ParameterGroup name="ScanItem">
            <Parameter name="Number of steps" type="unsignedInteger" value="100"/>
            <Parameter name="Object" type="cn" value=""/>
            <Parameter name="Type" type="unsignedInteger" value="0"/>
          </ParameterGroup>
          <ParameterGroup name="ScanItem">
            <Parameter name="Distribution type" type="unsignedInteger" value="0"/>
            <Parameter name="Maximum" type="float" value="20"/>
            <Parameter name="Minimum" type="float" value="12"/>
            <Parameter name="Number of steps" type="unsignedInteger" value="5"/>
            <Parameter name="Object" type="cn" value="CN=Root,Model=Yanfei,Vector=Values[KATPase],Reference=InitialValue"/>
            <Parameter name="Type" type="unsignedInteger" value="2"/>
            <Parameter name="log" type="bool" value="0"/>
          </ParameterGroup>
        </ParameterGroup>
        <Parameter name="Output in subtask" type="bool" value="0"/>
        <Parameter name="Adjust initial conditions" type="bool" value="0"/>
      </Problem>
      <Method name="Scan Framework" type="ScanFramework">
      </Method>
    </Task>
    <Task key="Task_17" name="Elementary Flux Modes" type="fluxMode" scheduled="false" updateModel="false">
      <Report reference="Report_10" target="" append="1" confirmOverwrite="1"/>
      <Problem>
      </Problem>
      <Method name="EFM Algorithm" type="EFMAlgorithm">
      </Method>
    </Task>
    <Task key="Task_18" name="Optimization" type="optimization" scheduled="false" updateModel="false">
      <Report reference="Report_11" target="" append="1" confirmOverwrite="1"/>
      <Problem>
        <Parameter name="Subtask" type="cn" value="CN=Root,Vector=TaskList[Steady-State]"/>
        <ParameterText name="ObjectiveExpression" type="expression">
          
        </ParameterText>
        <Parameter name="Maximize" type="bool" value="0"/>
        <Parameter name="Randomize Start Values" type="bool" value="0"/>
        <Parameter name="Calculate Statistics" type="bool" value="1"/>
        <ParameterGroup name="OptimizationItemList">
        </ParameterGroup>
        <ParameterGroup name="OptimizationConstraintList">
        </ParameterGroup>
      </Problem>
      <Method name="Random Search" type="RandomSearch">
        <Parameter name="Number of Iterations" type="unsignedInteger" value="100000"/>
        <Parameter name="Random Number Generator" type="unsignedInteger" value="1"/>
        <Parameter name="Seed" type="unsignedInteger" value="0"/>
      </Method>
    </Task>
    <Task key="Task_19" name="Parameter Estimation" type="parameterFitting" scheduled="false" updateModel="false">
      <Report reference="Report_12" target="" append="1" confirmOverwrite="1"/>
      <Problem>
        <Parameter name="Maximize" type="bool" value="0"/>
        <Parameter name="Randomize Start Values" type="bool" value="0"/>
        <Parameter name="Calculate Statistics" type="bool" value="1"/>
        <ParameterGroup name="OptimizationItemList">
        </ParameterGroup>
        <ParameterGroup name="OptimizationConstraintList">
        </ParameterGroup>
        <Parameter name="Steady-State" type="cn" value="CN=Root,Vector=TaskList[Steady-State]"/>
        <Parameter name="Time-Course" type="cn" value="CN=Root,Vector=TaskList[Time-Course]"/>
        <Parameter name="Create Parameter Sets" type="bool" value="0"/>
        <ParameterGroup name="Experiment Set">
        </ParameterGroup>
        <ParameterGroup name="Validation Set">
          <Parameter name="Threshold" type="unsignedInteger" value="5"/>
          <Parameter name="Weight" type="unsignedFloat" value="1"/>
        </ParameterGroup>
      </Problem>
      <Method name="Evolutionary Programming" type="EvolutionaryProgram">
        <Parameter name="Number of Generations" type="unsignedInteger" value="200"/>
        <Parameter name="Population Size" type="unsignedInteger" value="20"/>
        <Parameter name="Random Number Generator" type="unsignedInteger" value="1"/>
        <Parameter name="Seed" type="unsignedInteger" value="0"/>
      </Method>
    </Task>
    <Task key="Task_20" name="Metabolic Control Analysis" type="metabolicControlAnalysis" scheduled="false" updateModel="false">
      <Report reference="Report_13" target="" append="1" confirmOverwrite="1"/>
      <Problem>
        <Parameter name="Steady-State" type="key" value="Task_14"/>
      </Problem>
      <Method name="MCA Method (Reder)" type="MCAMethod(Reder)">
        <Parameter name="Modulation Factor" type="unsignedFloat" value="1e-009"/>
        <Parameter name="Use Reeder" type="bool" value="1"/>
        <Parameter name="Use Smallbone" type="bool" value="1"/>
      </Method>
    </Task>
    <Task key="Task_21" name="Lyapunov Exponents" type="lyapunovExponents" scheduled="false" updateModel="false">
      <Report reference="Report_14" target="" append="1" confirmOverwrite="1"/>
      <Problem>
        <Parameter name="ExponentNumber" type="unsignedInteger" value="3"/>
        <Parameter name="DivergenceRequested" type="bool" value="1"/>
        <Parameter name="TransientTime" type="float" value="0"/>
      </Problem>
      <Method name="Wolf Method" type="WolfMethod">
        <Parameter name="Orthonormalization Interval" type="unsignedFloat" value="1"/>
        <Parameter name="Overall time" type="unsignedFloat" value="1000"/>
        <Parameter name="Relative Tolerance" type="unsignedFloat" value="1e-006"/>
        <Parameter name="Absolute Tolerance" type="unsignedFloat" value="1e-012"/>
        <Parameter name="Max Internal Steps" type="unsignedInteger" value="10000"/>
      </Method>
    </Task>
    <Task key="Task_22" name="Time Scale Separation Analysis" type="timeScaleSeparationAnalysis" scheduled="false" updateModel="false">
      <Report reference="Report_15" target="" append="1" confirmOverwrite="1"/>
      <Problem>
        <Parameter name="StepNumber" type="unsignedInteger" value="100"/>
        <Parameter name="StepSize" type="float" value="0.01"/>
        <Parameter name="Duration" type="float" value="1"/>
        <Parameter name="TimeSeriesRequested" type="bool" value="1"/>
        <Parameter name="OutputStartTime" type="float" value="0"/>
      </Problem>
      <Method name="ILDM (LSODA,Deuflhard)" type="TimeScaleSeparation(ILDM,Deuflhard)">
        <Parameter name="Deuflhard Tolerance" type="unsignedFloat" value="1e-006"/>
      </Method>
    </Task>
    <Task key="Task_23" name="Sensitivities" type="sensitivities" scheduled="false" updateModel="false">
      <Report reference="Report_16" target="" append="1" confirmOverwrite="1"/>
      <Problem>
        <Parameter name="SubtaskType" type="unsignedInteger" value="1"/>
        <ParameterGroup name="TargetFunctions">
          <Parameter name="SingleObject" type="cn" value=""/>
          <Parameter name="ObjectListType" type="unsignedInteger" value="7"/>
        </ParameterGroup>
        <ParameterGroup name="ListOfVariables">
          <ParameterGroup name="Variables">
            <Parameter name="SingleObject" type="cn" value=""/>
            <Parameter name="ObjectListType" type="unsignedInteger" value="41"/>
          </ParameterGroup>
        </ParameterGroup>
      </Problem>
      <Method name="Sensitivities Method" type="SensitivitiesMethod">
        <Parameter name="Delta factor" type="unsignedFloat" value="0.001"/>
        <Parameter name="Delta minimum" type="unsignedFloat" value="1e-012"/>
      </Method>
    </Task>
    <Task key="Task_24" name="Moieties" type="moieties" scheduled="false" updateModel="false">
      <Problem>
      </Problem>
      <Method name="Householder Reduction" type="Householder">
      </Method>
    </Task>
    <Task key="Task_25" name="Cross Section" type="crosssection" scheduled="false" updateModel="false">
      <Problem>
        <Parameter name="StepNumber" type="unsignedInteger" value="100"/>
        <Parameter name="StepSize" type="float" value="0.01"/>
        <Parameter name="Duration" type="float" value="1"/>
        <Parameter name="TimeSeriesRequested" type="bool" value="1"/>
        <Parameter name="OutputStartTime" type="float" value="0"/>
        <Parameter name="Output Event" type="bool" value="0"/>
        <Parameter name="Continue on Simultaneous Events" type="bool" value="0"/>
        <Parameter name="LimitCrossings" type="bool" value="0"/>
        <Parameter name="NumCrossingsLimit" type="unsignedInteger" value="0"/>
        <Parameter name="LimitOutTime" type="bool" value="0"/>
        <Parameter name="LimitOutCrossings" type="bool" value="0"/>
        <Parameter name="PositiveDirection" type="bool" value="1"/>
        <Parameter name="NumOutCrossingsLimit" type="unsignedInteger" value="0"/>
        <Parameter name="LimitUntilConvergence" type="bool" value="0"/>
        <Parameter name="ConvergenceTolerance" type="float" value="1e-006"/>
        <Parameter name="Threshold" type="float" value="0"/>
        <Parameter name="DelayOutputUntilConvergence" type="bool" value="0"/>
        <Parameter name="OutputConvergenceTolerance" type="float" value="1e-006"/>
        <ParameterText name="TriggerExpression" type="expression">
          
        </ParameterText>
        <Parameter name="SingleVariable" type="cn" value=""/>
      </Problem>
      <Method name="Deterministic (LSODA)" type="Deterministic(LSODA)">
        <Parameter name="Integrate Reduced Model" type="bool" value="0"/>
        <Parameter name="Relative Tolerance" type="unsignedFloat" value="1e-006"/>
        <Parameter name="Absolute Tolerance" type="unsignedFloat" value="1e-012"/>
        <Parameter name="Max Internal Steps" type="unsignedInteger" value="10000"/>
      </Method>
    </Task>
    <Task key="Task_26" name="Linear Noise Approximation" type="linearNoiseApproximation" scheduled="false" updateModel="false">
      <Report reference="Report_17" target="" append="1" confirmOverwrite="1"/>
      <Problem>
        <Parameter name="Steady-State" type="key" value="Task_14"/>
      </Problem>
      <Method name="Linear Noise Approximation" type="LinearNoiseApproximation">
      </Method>
    </Task>
  </ListOfTasks>
  <ListOfReports>
    <Report key="Report_9" name="Steady-State" taskType="steadyState" separator="&#x09;" precision="6">
      <Comment>
        Automatically generated report.
      </Comment>
      <Footer>
        <Object cn="CN=Root,Vector=TaskList[Steady-State]"/>
      </Footer>
    </Report>
    <Report key="Report_10" name="Elementary Flux Modes" taskType="fluxMode" separator="&#x09;" precision="6">
      <Comment>
        Automatically generated report.
      </Comment>
      <Footer>
        <Object cn="CN=Root,Vector=TaskList[Elementary Flux Modes],Object=Result"/>
      </Footer>
    </Report>
    <Report key="Report_11" name="Optimization" taskType="optimization" separator="&#x09;" precision="6">
      <Comment>
        Automatically generated report.
      </Comment>
      <Header>
        <Object cn="CN=Root,Vector=TaskList[Optimization],Object=Description"/>
        <Object cn="String=\[Function Evaluations\]"/>
        <Object cn="Separator=&#x09;"/>
        <Object cn="String=\[Best Value\]"/>
        <Object cn="Separator=&#x09;"/>
        <Object cn="String=\[Best Parameters\]"/>
      </Header>
      <Body>
        <Object cn="CN=Root,Vector=TaskList[Optimization],Problem=Optimization,Reference=Function Evaluations"/>
        <Object cn="Separator=&#x09;"/>
        <Object cn="CN=Root,Vector=TaskList[Optimization],Problem=Optimization,Reference=Best Value"/>
        <Object cn="Separator=&#x09;"/>
        <Object cn="CN=Root,Vector=TaskList[Optimization],Problem=Optimization,Reference=Best Parameters"/>
      </Body>
      <Footer>
        <Object cn="String=&#x0a;"/>
        <Object cn="CN=Root,Vector=TaskList[Optimization],Object=Result"/>
      </Footer>
    </Report>
    <Report key="Report_12" name="Parameter Estimation" taskType="parameterFitting" separator="&#x09;" precision="6">
      <Comment>
        Automatically generated report.
      </Comment>
      <Header>
        <Object cn="CN=Root,Vector=TaskList[Parameter Estimation],Object=Description"/>
        <Object cn="String=\[Function Evaluations\]"/>
        <Object cn="Separator=&#x09;"/>
        <Object cn="String=\[Best Value\]"/>
        <Object cn="Separator=&#x09;"/>
        <Object cn="String=\[Best Parameters\]"/>
      </Header>
      <Body>
        <Object cn="CN=Root,Vector=TaskList[Parameter Estimation],Problem=Parameter Estimation,Reference=Function Evaluations"/>
        <Object cn="Separator=&#x09;"/>
        <Object cn="CN=Root,Vector=TaskList[Parameter Estimation],Problem=Parameter Estimation,Reference=Best Value"/>
        <Object cn="Separator=&#x09;"/>
        <Object cn="CN=Root,Vector=TaskList[Parameter Estimation],Problem=Parameter Estimation,Reference=Best Parameters"/>
      </Body>
      <Footer>
        <Object cn="String=&#x0a;"/>
        <Object cn="CN=Root,Vector=TaskList[Parameter Estimation],Object=Result"/>
      </Footer>
    </Report>
    <Report key="Report_13" name="Metabolic Control Analysis" taskType="metabolicControlAnalysis" separator="&#x09;" precision="6">
      <Comment>
        Automatically generated report.
      </Comment>
      <Header>
        <Object cn="CN=Root,Vector=TaskList[Metabolic Control Analysis],Object=Description"/>
      </Header>
      <Footer>
        <Object cn="String=&#x0a;"/>
        <Object cn="CN=Root,Vector=TaskList[Metabolic Control Analysis],Object=Result"/>
      </Footer>
    </Report>
    <Report key="Report_14" name="Lyapunov Exponents" taskType="lyapunovExponents" separator="&#x09;" precision="6">
      <Comment>
        Automatically generated report.
      </Comment>
      <Header>
        <Object cn="CN=Root,Vector=TaskList[Lyapunov Exponents],Object=Description"/>
      </Header>
      <Footer>
        <Object cn="String=&#x0a;"/>
        <Object cn="CN=Root,Vector=TaskList[Lyapunov Exponents],Object=Result"/>
      </Footer>
    </Report>
    <Report key="Report_15" name="Time Scale Separation Analysis" taskType="timeScaleSeparationAnalysis" separator="&#x09;" precision="6">
      <Comment>
        Automatically generated report.
      </Comment>
      <Header>
        <Object cn="CN=Root,Vector=TaskList[Time Scale Separation Analysis],Object=Description"/>
      </Header>
      <Footer>
        <Object cn="String=&#x0a;"/>
        <Object cn="CN=Root,Vector=TaskList[Time Scale Separation Analysis],Object=Result"/>
      </Footer>
    </Report>
    <Report key="Report_16" name="Sensitivities" taskType="sensitivities" separator="&#x09;" precision="6">
      <Comment>
        Automatically generated report.
      </Comment>
      <Header>
        <Object cn="CN=Root,Vector=TaskList[Sensitivities],Object=Description"/>
      </Header>
      <Footer>
        <Object cn="String=&#x0a;"/>
        <Object cn="CN=Root,Vector=TaskList[Sensitivities],Object=Result"/>
      </Footer>
    </Report>
    <Report key="Report_17" name="Linear Noise Approximation" taskType="linearNoiseApproximation" separator="&#x09;" precision="6">
      <Comment>
        Automatically generated report.
      </Comment>
      <Header>
        <Object cn="CN=Root,Vector=TaskList[Linear Noise Approximation],Object=Description"/>
      </Header>
      <Footer>
        <Object cn="String=&#x0a;"/>
        <Object cn="CN=Root,Vector=TaskList[Linear Noise Approximation],Object=Result"/>
      </Footer>
    </Report>
  </ListOfReports>
  <ListOfPlots>
    <PlotSpecification name="plot_1" type="Plot2D" active="0">
      <Parameter name="log X" type="bool" value="0"/>
      <Parameter name="log Y" type="bool" value="0"/>
      <ListOfPlotItems>
        <PlotItem name="Values[ATP consumption flux/ Pyruvate flux ]|Values[KATPase].InitialValue" type="Curve2D">
          <Parameter name="Color" type="string" value="auto"/>
          <Parameter name="Line subtype" type="unsignedInteger" value="0"/>
          <Parameter name="Line type" type="unsignedInteger" value="0"/>
          <Parameter name="Line width" type="unsignedFloat" value="1"/>
          <Parameter name="Recording Activity" type="string" value="during"/>
          <Parameter name="Symbol subtype" type="unsignedInteger" value="0"/>
          <ListOfChannels>
            <ChannelSpec cn="CN=Root,Model=Yanfei,Vector=Values[KATPase],Reference=InitialValue"/>
            <ChannelSpec cn="CN=Root,Model=Yanfei,Vector=Values[ATP consumption flux/ Pyruvate flux ],Reference=Value"/>
          </ListOfChannels>
        </PlotItem>
        <PlotItem name="Values[ATP/ADP ratio]|Values[KATPase].InitialValue" type="Curve2D">
          <Parameter name="Color" type="string" value="auto"/>
          <Parameter name="Line subtype" type="unsignedInteger" value="0"/>
          <Parameter name="Line type" type="unsignedInteger" value="2"/>
          <Parameter name="Line width" type="unsignedFloat" value="1"/>
          <Parameter name="Recording Activity" type="string" value="during"/>
          <Parameter name="Symbol subtype" type="unsignedInteger" value="0"/>
          <ListOfChannels>
            <ChannelSpec cn="CN=Root,Model=Yanfei,Vector=Values[KATPase],Reference=InitialValue"/>
            <ChannelSpec cn="CN=Root,Model=Yanfei,Vector=Values[ATP/ADP ratio],Reference=Value"/>
          </ListOfChannels>
        </PlotItem>
      </ListOfPlotItems>
    </PlotSpecification>
  </ListOfPlots>
  <GUI>
  </GUI>
  <SBMLReference file="kouril3.xml">
    <SBMLMap SBMLid="KbisP" COPASIkey="ModelValue_0"/>
    <SBMLMap SBMLid="Kgap" COPASIkey="ModelValue_1"/>
    <SBMLMap SBMLid="KiADP" COPASIkey="ModelValue_2"/>
    <SBMLMap SBMLid="Knadp" COPASIkey="ModelValue_3"/>
    <SBMLMap SBMLid="Knadph" COPASIkey="ModelValue_4"/>
    <SBMLMap SBMLid="KpgkADP" COPASIkey="ModelValue_5"/>
    <SBMLMap SBMLid="KpgkATP" COPASIkey="ModelValue_6"/>
    <SBMLMap SBMLid="KpgkP3G" COPASIkey="ModelValue_7"/>
    <SBMLMap SBMLid="KpgkbisP" COPASIkey="ModelValue_8"/>
    <SBMLMap SBMLid="Kpi" COPASIkey="ModelValue_9"/>
    <SBMLMap SBMLid="VmfPGK" COPASIkey="ModelValue_10"/>
    <SBMLMap SBMLid="Vmfor" COPASIkey="ModelValue_11"/>
    <SBMLMap SBMLid="adp" COPASIkey="Metabolite_1"/>
    <SBMLMap SBMLid="atp" COPASIkey="Metabolite_3"/>
    <SBMLMap SBMLid="bpg" COPASIkey="Metabolite_5"/>
    <SBMLMap SBMLid="default_compartment" COPASIkey="Compartment_1"/>
    <SBMLMap SBMLid="gap" COPASIkey="Metabolite_7"/>
    <SBMLMap SBMLid="kPK" COPASIkey="ModelValue_12"/>
    <SBMLMap SBMLid="kdbpg" COPASIkey="ModelValue_13"/>
    <SBMLMap SBMLid="n" COPASIkey="ModelValue_14"/>
    <SBMLMap SBMLid="p3g" COPASIkey="Metabolite_9"/>
    <SBMLMap SBMLid="pep" COPASIkey="Metabolite_11"/>
    <SBMLMap SBMLid="pyr" COPASIkey="Metabolite_13"/>
    <SBMLMap SBMLid="v_1" COPASIkey="Reaction_0"/>
  </SBMLReference>
</COPASI>
